# Supplementary material for: Association of female reproductive tract microbiota with egg production in layer chickens
Source: PubMed Central journal article supplement (PMC8460357; doi:10.1093/gigascience/giab067), 2021-09-23

## Female reproductive tract microbiota influence egg production in layer chickens --Manuscript Draft--

|                                                      |                                                                                                                                                                                                                                                                                                                                                                                                                                                                                                                                                                                                                                                                                                                                                                                                                                                                                                                                                                                                                                                                                                                                                                         |                  |
|------------------------------------------------------|-------------------------------------------------------------------------------------------------------------------------------------------------------------------------------------------------------------------------------------------------------------------------------------------------------------------------------------------------------------------------------------------------------------------------------------------------------------------------------------------------------------------------------------------------------------------------------------------------------------------------------------------------------------------------------------------------------------------------------------------------------------------------------------------------------------------------------------------------------------------------------------------------------------------------------------------------------------------------------------------------------------------------------------------------------------------------------------------------------------------------------------------------------------------------|------------------|
| <b>Manuscript Number:</b>                            | GIGA-D-21-00132                                                                                                                                                                                                                                                                                                                                                                                                                                                                                                                                                                                                                                                                                                                                                                                                                                                                                                                                                                                                                                                                                                                                                         |                  |
| <b>Full Title:</b>                                   | Female reproductive tract microbiota influence egg production in layer chickens                                                                                                                                                                                                                                                                                                                                                                                                                                                                                                                                                                                                                                                                                                                                                                                                                                                                                                                                                                                                                                                                                         |                  |
| <b>Article Type:</b>                                 | Research                                                                                                                                                                                                                                                                                                                                                                                                                                                                                                                                                                                                                                                                                                                                                                                                                                                                                                                                                                                                                                                                                                                                                                |                  |
| <b>Funding Information:</b>                          | Department of Science and Technology of Sichuan Province (2019JDTD0009)                                                                                                                                                                                                                                                                                                                                                                                                                                                                                                                                                                                                                                                                                                                                                                                                                                                                                                                                                                                                                                                                                                 | Pro. Diyan Li    |
|                                                      | Fok Ying Tong Education Foundation (161026)                                                                                                                                                                                                                                                                                                                                                                                                                                                                                                                                                                                                                                                                                                                                                                                                                                                                                                                                                                                                                                                                                                                             | Pro. Diyan Li    |
|                                                      | Department of Science and Technology of Sichuan Province (2020YFH0138)                                                                                                                                                                                                                                                                                                                                                                                                                                                                                                                                                                                                                                                                                                                                                                                                                                                                                                                                                                                                                                                                                                  | Dr. Zhongxian Xu |
|                                                      | Department of Science and Technology of Sichuan Province (2021YFYZ0009)                                                                                                                                                                                                                                                                                                                                                                                                                                                                                                                                                                                                                                                                                                                                                                                                                                                                                                                                                                                                                                                                                                 | Pro. Mingzhou Li |
| <b>Abstract:</b>                                     | <p>The microbiota of the female reproductive tract is increasingly recognized as having fundamental roles in animal reproduction. To explore the relative contribution of reproductive tract microbiomes on egg production in chickens, we investigated the microbiota in multiple reproductive and digestive tract sites from 128 female layer (egg-producing) chickens in comparable environments. We identified substantial differences between the diversity, composition, and predicted function of site-associated microbiota. Reproductive tract microbiota were more profoundly affected egg production than that in the digestive tract. We identified four reproductive tract microbial species, <i>Bacteroides fragilis</i>, <i>B. salanitronis</i>, <i>B. barnesiae</i>, and <i>Clostridium leptum</i>, which were related to immune function and potentially contribute to enhanced egg production. These findings provide insights into the diverse microbiota characteristics of reproductive and digestive tracts, and may help design strategies for controlling and manipulating chicken reproductive tract microbiota to improve egg production.</p> |                  |
| <b>Corresponding Author:</b>                         | Diyan Li<br><br>CHINA                                                                                                                                                                                                                                                                                                                                                                                                                                                                                                                                                                                                                                                                                                                                                                                                                                                                                                                                                                                                                                                                                                                                                   |                  |
| <b>Corresponding Author Secondary Information:</b>   |                                                                                                                                                                                                                                                                                                                                                                                                                                                                                                                                                                                                                                                                                                                                                                                                                                                                                                                                                                                                                                                                                                                                                                         |                  |
| <b>Corresponding Author's Institution:</b>           |                                                                                                                                                                                                                                                                                                                                                                                                                                                                                                                                                                                                                                                                                                                                                                                                                                                                                                                                                                                                                                                                                                                                                                         |                  |
| <b>Corresponding Author's Secondary Institution:</b> |                                                                                                                                                                                                                                                                                                                                                                                                                                                                                                                                                                                                                                                                                                                                                                                                                                                                                                                                                                                                                                                                                                                                                                         |                  |
| <b>First Author:</b>                                 | Yuan Su                                                                                                                                                                                                                                                                                                                                                                                                                                                                                                                                                                                                                                                                                                                                                                                                                                                                                                                                                                                                                                                                                                                                                                 |                  |
| <b>First Author Secondary Information:</b>           |                                                                                                                                                                                                                                                                                                                                                                                                                                                                                                                                                                                                                                                                                                                                                                                                                                                                                                                                                                                                                                                                                                                                                                         |                  |
| <b>Order of Authors:</b>                             | Yuan Su                                                                                                                                                                                                                                                                                                                                                                                                                                                                                                                                                                                                                                                                                                                                                                                                                                                                                                                                                                                                                                                                                                                                                                 |                  |
|                                                      | Shilin Tian                                                                                                                                                                                                                                                                                                                                                                                                                                                                                                                                                                                                                                                                                                                                                                                                                                                                                                                                                                                                                                                                                                                                                             |                  |
|                                                      | Diyan Li                                                                                                                                                                                                                                                                                                                                                                                                                                                                                                                                                                                                                                                                                                                                                                                                                                                                                                                                                                                                                                                                                                                                                                |                  |
|                                                      | Wei Zhu                                                                                                                                                                                                                                                                                                                                                                                                                                                                                                                                                                                                                                                                                                                                                                                                                                                                                                                                                                                                                                                                                                                                                                 |                  |
|                                                      | Tao Wang                                                                                                                                                                                                                                                                                                                                                                                                                                                                                                                                                                                                                                                                                                                                                                                                                                                                                                                                                                                                                                                                                                                                                                |                  |
|                                                      | Shailendra Kumar Mishra                                                                                                                                                                                                                                                                                                                                                                                                                                                                                                                                                                                                                                                                                                                                                                                                                                                                                                                                                                                                                                                                                                                                                 |                  |
|                                                      | Ranlei Wei                                                                                                                                                                                                                                                                                                                                                                                                                                                                                                                                                                                                                                                                                                                                                                                                                                                                                                                                                                                                                                                                                                                                                              |                  |
|                                                      | Zhongxian Xu                                                                                                                                                                                                                                                                                                                                                                                                                                                                                                                                                                                                                                                                                                                                                                                                                                                                                                                                                                                                                                                                                                                                                            |                  |
|                                                      | Mengnan He                                                                                                                                                                                                                                                                                                                                                                                                                                                                                                                                                                                                                                                                                                                                                                                                                                                                                                                                                                                                                                                                                                                                                              |                  |

|                                                                                                                                                                                                                                                                                                                                                                                                                                                                                               |                 |
|-----------------------------------------------------------------------------------------------------------------------------------------------------------------------------------------------------------------------------------------------------------------------------------------------------------------------------------------------------------------------------------------------------------------------------------------------------------------------------------------------|-----------------|
|                                                                                                                                                                                                                                                                                                                                                                                                                                                                                               | Xiaoling Zhao   |
|                                                                                                                                                                                                                                                                                                                                                                                                                                                                                               | Huadong Yin     |
|                                                                                                                                                                                                                                                                                                                                                                                                                                                                                               | Xiaolan Fan     |
|                                                                                                                                                                                                                                                                                                                                                                                                                                                                                               | Bo Zeng         |
|                                                                                                                                                                                                                                                                                                                                                                                                                                                                                               | Mingyao Yang    |
|                                                                                                                                                                                                                                                                                                                                                                                                                                                                                               | Deying Yang     |
|                                                                                                                                                                                                                                                                                                                                                                                                                                                                                               | Qingyong Ni     |
|                                                                                                                                                                                                                                                                                                                                                                                                                                                                                               | Yan Li          |
|                                                                                                                                                                                                                                                                                                                                                                                                                                                                                               | Mingwang Zhang  |
|                                                                                                                                                                                                                                                                                                                                                                                                                                                                                               | Qing Zhu        |
|                                                                                                                                                                                                                                                                                                                                                                                                                                                                                               | Mingzhou Li     |
| <b>Order of Authors Secondary Information:</b>                                                                                                                                                                                                                                                                                                                                                                                                                                                |                 |
| <b>Additional Information:</b>                                                                                                                                                                                                                                                                                                                                                                                                                                                                |                 |
| <b>Question</b>                                                                                                                                                                                                                                                                                                                                                                                                                                                                               | <b>Response</b> |
| Are you submitting this manuscript to a special series or article collection?                                                                                                                                                                                                                                                                                                                                                                                                                 | No              |
| <b>Experimental design and statistics</b><br><br>Full details of the experimental design and statistical methods used should be given in the Methods section, as detailed in our <a href="#">Minimum Standards Reporting Checklist</a> . Information essential to interpreting the data presented should be made available in the figure legends.<br><br>Have you included all the information requested in your manuscript?                                                                  | Yes             |
| <b>Resources</b><br><br>A description of all resources used, including antibodies, cell lines, animals and software tools, with enough information to allow them to be uniquely identified, should be included in the Methods section. Authors are strongly encouraged to cite <a href="#">Research Resource Identifiers</a> (RRIDs) for antibodies, model organisms and tools, where possible.<br><br>Have you included the information requested as detailed in our <a href="#">Minimum</a> | Yes             |

|                                                                                                                                                                                                                                                                                                                                                                                                                                                                                                                                                         |     |
|---------------------------------------------------------------------------------------------------------------------------------------------------------------------------------------------------------------------------------------------------------------------------------------------------------------------------------------------------------------------------------------------------------------------------------------------------------------------------------------------------------------------------------------------------------|-----|
| <a href="#">Standards Reporting Checklist?</a>                                                                                                                                                                                                                                                                                                                                                                                                                                                                                                          |     |
| <p><b>Availability of data and materials</b></p> <p>All datasets and code on which the conclusions of the paper rely must be either included in your submission or deposited in <a href="#">publicly available repositories</a> (where available and ethically appropriate), referencing such data using a unique identifier in the references and in the “Availability of Data and Materials” section of your manuscript.</p> <p>Have you have met the above requirement as detailed in our <a href="#">Minimum Standards Reporting Checklist?</a></p> | Yes |

# 1 **Female reproductive tract microbiota influence egg production in layer chickens**

2 Yuan Su<sup>1,†</sup>, Shilin Tian<sup>2,3,†</sup>, Diyan Li<sup>1,\*†</sup>, Wei Zhu<sup>1,†</sup>, Tao Wang<sup>1,†</sup>, Shailendra Kumar Mishra<sup>1</sup>, Ranlei  
3 Wei<sup>4</sup>, Zhongxian Xu<sup>1</sup>, Mengnan He<sup>1</sup>, Xiaoling Zhao<sup>1</sup>, Huadong Yin<sup>1</sup>, Xiaolan Fan<sup>1</sup>, Bo Zeng<sup>1</sup>, Mingyao  
4 Yang<sup>1</sup>, Deying Yang<sup>1</sup>, Qingyong Ni<sup>1</sup>, Yan Li<sup>1</sup>, Mingwang Zhang<sup>1</sup>, Qing Zhu<sup>1,\*</sup>, Mingzhou Li<sup>1,\*</sup>

5

6 <sup>1</sup>Farm Animal Genetic Resources Exploration and Innovation Key Laboratory of Sichuan Province,  
7 Sichuan Agricultural University, Chengdu 611130, China.

8 <sup>2</sup>Department of Ecology, Hubei Key Laboratory of Cell Homeostasis, College of Life Sciences, Wuhan  
9 University, Wuhan 430072, China.

10 <sup>3</sup>Novogene Bioinformatics Institute, Beijing 100000, China.

11 <sup>4</sup>Center of Precision Medicine, West China Hospital, Sichuan University, Chengdu 610065, China.

12 <sup>†</sup>These authors contributed equally to this paper.

13 <sup>\*</sup>Corresponding author. e-mail: Diyan Li: diyanli@sicau.edu.cn; Qing Zhu: zhuqing@sicau.edu.cn;

14 Mingzhou Li: mingzhou.li@sicau.edu.cn

15

## 16 **Abstract**

17 The microbiota of the female reproductive tract is increasingly recognized as having  
18 fundamental roles in animal reproduction. To explore the relative contribution of  
19 reproductive tract microbiomes on egg production in chickens, we investigated the

20 microbiota in multiple reproductive and digestive tract sites from 128 female layer  
21 (egg-producing) chickens in comparable environments. We identified substantial  
22 differences between the diversity, composition, and predicted function of site-  
23 associated microbiota. Reproductive tract microbiota were more profoundly affected  
24 egg production than that in the digestive tract. We identified four reproductive tract  
25 microbial species, *Bacteroides fragilis*, *B. salanitronis*, *B. barnesiae*, and *Clostridium*  
26 *leptum*, which were related to immune function and potentially contribute to enhanced  
27 egg production. These findings provide insights into the diverse microbiota  
28 characteristics of reproductive and digestive tracts, and may help design strategies for  
29 controlling and manipulating chicken reproductive tract microbiota to improve egg  
30 production.

31 **Keywords:** microbiota, reproductive tract, egg production, chicken

32

### 33 **Background**

34 The domestic chicken (*Gallus gallus domesticus*) is of enormous agricultural  
35 significance, comprising broiler (meat-producing) and layer (egg-producing) chickens.  
36 Specialized commercial layer breeds were established during the twentieth century with  
37 greatly improved reproductive traits [1]. Currently, thousands of quantitative trait loci  
38 (QTLs) [2] and many gene mutations [3, 4] are reportedly associated with chicken  
39 reproductive traits. Nonetheless, egg production, as a polygenic inheritance trait,  
40 exhibits low to moderate heritability ( $h^2$ , ranging from 0.05 to 0.44, depending on the  
41 period involved) [5, 6]. Alternative effective approaches for modulating egg production  
42 in laying hens are urgently required for the poultry industry to meet consumer demand.

43 Distinct bacterial communities throughout the female reproductive tract form a

44 microbiota continuum from the vagina to the isthmus, which has a prominent role in  
45 animal reproduction [7, 8]. In humans, microbiome interactions with the host during  
46 pregnancy leading to preterm birth were investigated [9], and temporal changes in the  
47 vaginal microbiome associated with full-term pregnancies were identified [10]. An  
48 abnormal vaginal microbiota may predispose individuals to increased colonization of  
49 the genital tract, microbial invasion of the amniotic cavity, and fetal damage. The avian  
50 reproductive tract houses complex bacterial communities that are believed to play  
51 crucial roles in egg production [11]. Chicken digestive and reproductive tracts are  
52 mainly colonized by *Firmicutes*, *Bacteroidetes*, *Proteobacteria*, *Actinobacteria*, and  
53 *Fusobacteria*, which are spatially organized within specific digestive and reproductive  
54 compartments [12, 13]. Additionally, *Lactobacillus* species were found to be keystone  
55 species residing in the chicken oviduct [14].

56 Several synergistic factors, such as environment and diet, dominate over host  
57 genetics in determining gut microbiota composition [15, 16]. A comparative study of  
58 gut microbial diversity among parrot species indicated the potential role of host  
59 ancestry in shaping the gut microbiome [17]. A genome-wide association study (GWAS)  
60 in chickens demonstrated the genetic loci rs15142709 and rs15142674 which are  
61 located in the pleiomorphic adenoma gene 1 (*PLAG1*) and lck/yes-related novel  
62 tyrosine kinase (*LYN*) genes were significantly associated with microbial  
63 *Methanobacterium* abundance [18]. In a previous study, 14 identified QTLs strongly  
64 influenced *Clostridium leptum* and *Lactobacillus* abundance, as well as related  
65 candidate genes involved in anti-inflammatory responses and the motility of the  
66 digestive tract [19]. On the other hand, recent studies have suggested that host genetics  
67 have limited impact on gut microbiota composition in humans [20]. Therefore, we  
68 realized that the relative abundance of some microorganisms is influenced by host

69 genetics.

70 We speculated that the microbial component of the reproductive tract might be an  
71 important aspect of egg production in chicken. Here, we performed whole-genome  
72 sequencing on 128 laying hens and profiled taxonomic abundance in 768 samples from  
73 three reproductive (vagina, uterus, and isthmus) and three digestive (crop, gizzard, and  
74 small intestine) tract sites by sequencing the V4 region of the 16S rRNA gene. We  
75 characterized the reproductive tract microbiota and its features compared with those of  
76 the digestive tract microbiota of hens. We identified the contribution of key  
77 microorganisms to egg production, and established a correlation between host genetics  
78 and the microbial diversity of six tract sites. These findings provide insights into the  
79 microbial communities in the reproductive tract of highly specialized layer populations,  
80 which may help develop strategies to enhance commercial egg production.

81

## 82 **Methods**

### 83 **Chickens**

84 The study was conducted on a common flock of 128 Dongxiang green shell laying hens  
85 reared on an experimental poultry farm at Sichuan Agricultural University in Ya'an,  
86 Sichuan, China. All chicks were hatched on the same day and housed in individual pens.  
87 Feed intake was controlled daily according to standard farm husbandry practices and  
88 water was provided *ad libitum*. The number of eggs produced for the first 300 days of  
89 life was recorded daily for each individual. We determined that the mean number of  
90 eggs (~75.32; ranging from 24-129) that each hen laid by 300 days of age (EN300) fit  
91 a normal distribution pattern ( $P = 0.725$ , Kolmogorov-Smirnov test) (**Supplementary**  
92 **Fig. S1**). At the age of 300 days, 2 mL of whole blood was collected from the wing

93 vein using venipuncture and stored at -20 °C. Subsequently, each individual was culled  
94 by cervical dislocation followed by decapitation. After laparotomy, fresh tissue was  
95 collected from three sites in the reproductive tract (vagina, uterus and isthmus) and  
96 three sites in the digestive tract (crop, gizzard and small intestine) (**Fig. 1a**). Samples  
97 were snap-frozen in liquid nitrogen, transported to the laboratory, and stored at -80 °C  
98 until further analysis.

99

#### 100 **Microbial genomic DNA extraction**

101 Total microbial genomic DNA from lumen of digestive tracts and mucus of  
102 reproductive tracts were extracted from ~200 mg tissues using a TIANamp Stool DNA  
103 Kit (Tiangen Biotech, Beijing, China) according to the manufacturer's instructions.  
104 Host DNA was isolated from blood using a TIANamp Genomic DNA Kit (Tiangen  
105 Biotech) following the manufacturer's instructions. The extracted DNA was quantified  
106 using a NanoDrop2000 spectrophotometer (Thermo Fisher Scientific, Chengdu, China),  
107 and DNA integrity was determined by 1% agarose gel electrophoresis.

108

#### 109 **16S rRNA amplicon and sequencing**

110 The V4 hypervariable region of the bacterial 16S rRNA gene was amplified using a  
111 HOTSTAR Taq Plus Master Mix Kit (Qiagen, Shanghai, China) and the universal  
112 primers 515 F (5'-GTGCCAGCMGCCGCGGTAA-3') and 806 R (5'-  
113 GGACTACHVGGGTWTCTAAT -3') [21]. Reactions were carried out using 15 µL of  
114 Phusion High-Fidelity PCR Master Mix (New England Biolabs, Ipswich, Ma, USA),  
115 3 µL of the forward and reverse primers, 10 µL of template DNA, and 2 µL of ddH<sub>2</sub>O,  
116 no template control was also performed. The PCR cycling conditions were as follows:



117 an initial denaturation step at 98 °C for 1 min and 30 cycles of 98 °C for 10 sec, 50 °C  
118 for 30 sec, and 72 °C for 30 sec, followed by an extension step at 72 °C for 5 min, using  
119 a Bio-Rad CFX96 thermal cycler (Bio-Rad Laboratories, Hercules, CA, USA).  
120 Amplicons were purified on agarose gel (1%) using a GeneJET Gel Extraction kit  
121 (Thermo Fisher Scientific, Schwerte, Germany). A DNA library was prepared using an  
122 Ion Plus Fragment Library Kit (Thermo Fisher Scientific) based on the manufacturer's  
123 instructions. Reads were barcoded per sample, combined for multiplexed sequencing  
124 with the Ion S5<sup>TM</sup> XL platform (Thermo Fisher Scientific) to generate 400-bp single-  
125 end reads, and sequenced by Novogene Bioinformatics Technology Co. Ltd of China.

126

### 127 **Whole-genome sequencing**

128 After qualified host DNA samples were tested, the DNA was randomly fragmented  
129 using an ultrasonicator (Covaris Inc., Woburn, MA, USA), and then a sequencing  
130 library was prepared using a TruSeq Nano DNA HT Sample Preparation Kit (Illumina,  
131 San Diego, CA, USA) following the manufacturer's instructions. Index codes were  
132 added to tag each sample. DNA fragments were then end-repaired, dA-tailed, and  
133 ligated with a full-length adapter for Illumina sequencing, PCR amplification, and  
134 purification. Next, isolated DNA libraries were constructed with an insert size of 350  
135 bp. Finally, genomes of the 128 individuals were separately sequenced with 150 bp  
136 paired-end reads using the Illumina Novaseq platform by Novogene Bioinformatics  
137 Technology Co. Ltd.

138

### 139 **16S rRNA-seq data processing**

140 The raw data obtained by sequencing were first filtered to obtain high-quality data. First,

141 the adapter sequences in 61.05 million (M) raw reads (**Supplementary Table S1**) were  
142 trimmed using Cutadapt (version 1.9.1) [22] when the overlap length between the read  
143 and the adapter was shorter than 10 bp. Then, barcode sequences were trimmed and  
144 reads that were too long (> 260 bp) or too short (< 220 bp) were filtered using Cutadapt  
145 with the parameters “-e 0 -q 17 -m 200 -M 2600”. Next, the remaining reads were  
146 compared with the ChimeraSlayer reference database using the UCHIME algorithm [23]  
147 to detect and then remove chimera sequences. Finally, low-quality reads (i.e., more than  
148 50% of bases with a phred quality lower than five) were also removed. Consequently,  
149 57.61 M high-quality reads were generated for subsequent analysis (**Supplementary**  
150 **Table S2**). Greater than 93.85% of the high-quality reads had lengths of 250 - 260 nt.  
151 Data with a quality score > 20 accounted for 88.14% of all the effective bases. The error  
152 ratio of the sequencing reads was relatively high in the ending position.

153

#### 154 **Operational taxonomic unit (OTU) cluster and species annotation**

155 The remaining high-quality sequences were used to generate operational taxonomic  
156 units (OTUs) by Uparse software (version 7.0.1001) [24] with an identity cutoff of 97%.  
157 Singleton OTUs that did not match the reference database were removed. Clustering  
158 across all samples from the 128 chickens produced 46,480 OTUs after singleton  
159 removal. Nonetheless, most of those OTUs were present in low abundance and were  
160 found in very few samples. We then discarded OTUs that were not found in at least 20%  
161 of the chickens in each sampling site, yielding 6,776 OTUs. For each OTU, the  
162 SSUrRNA library in the Silva (<https://www.arb-silva.de/>) [25] was used to annotate  
163 taxonomic information (i.e., kingdom, phylum, class, order, family, genus and species)  
164 based on the Mothur algorithm [26]. Subsequently, we determined the phylogenetic

165 relationship of different OTUs and dominant species differences in samples (groups)  
166 after multiple sequence alignment using MUSCLE software (version 3.8.31) [27].  
167 Additionally, OTU abundance information was normalized using a standard sequence  
168 number corresponding to the sample with the fewest sequences.

169

### 170 **Alpha diversity**

171 Alpha diversity was used to analyze the complexity of species diversity for a sample  
172 based on normalized OTUs through six indices (i.e., observed OTUs, Chao1, Shannon,  
173 Simpson, ACE, Good's coverage), using the QIIME2 software [28]. Among these,  
174 Chao1 and ACE were selected to identify community richness, Shannon and Simpson  
175 were used to identify community diversity, and Good's coverage was used to  
176 characterize sequencing depth. Differences in alpha diversity indices among the six  
177 sites were calculated with the Wilcoxon rank-sum test using R software (version 2.15.3).

178

### 179 **Beta diversity**

180 Beta diversity was used to evaluate differences in samples. Beta diversity in Bray-Curtis  
181 (BC) and weighted/unweighted UniFrac distances were calculated using QIIME2  
182 software [28]. The BC ordination provided position values along an ordination axis and  
183 distances from the axis for samples of communities.

184

### 185 **Principal coordinates analysis (PCoA)**

186 PCoA was performed to obtain principal coordinates and to visualize complex,  
187 multidimensional data. A distance matrix of previously obtained weighted/unweighted

188 UniFrac distances among samples was transformed to a new set of orthogonal axes, by  
189 which the maximum variation factor was demonstrated by the first principal coordinate,  
190 the second maximum variation factor was demonstrated by the second principal  
191 coordinate, and so on. PCoA was performed using the WGCNA package [29], stat  
192 packages, and ggplot2 package in R software.

193

#### 194 **Prediction of the functional profiles of microbial communities**

195 The functions of the microorganisms present in the microbial communities detected in  
196 the six sites were predicted using PICRUSt2 [30]. We used the Wilcoxon rank-sum test  
197 to investigate differences in pathways among sites. *P*-values were adjusted using the  
198 Benjamini-Hochberg method by the false discovery rate (FDR) with the `p.adjust`  
199 function in R.

200

#### 201 **Community difference analysis**

202 Pairwise comparisons between different sites were statistically compared using  
203 Analysis of Similarity (ANOSIM, also named permutational MANOVA) with 10,000  
204 permutations based on BC ordination to evaluate the reasonability of the division of  
205 groups.

206

#### 207 **Between-group variation analysis**

208 High-dimensional biomarkers were discovered by Linear discriminant analysis (LDA)  
209 Effect Size (LEfSe) using the parameter ‘LDA score > 4’ [31] to identify characteristics  
210 of abundance and related classes (e.g., genes, metabolites, or taxa).

211

## 212 **Identification of microbiota constituents related to egg production**

213 EN300 values between two groups (the lowest- and highest-ranked 20% of chickens  
214 with respect to their EN300 value) were then compared using the Wilcoxon rank-sum  
215 test. Microorganisms with  $P < 0.05$  and  $FDR < 0.05$  were retained. Furthermore, we  
216 calculated the Spearman's  $r$  and Pearson's  $r$  between EN300 and the abundance of each  
217 microbiota constituent at genus, OTU, and species levels. A significant correlation  
218 between the presence of a microorganism and the EN300 value was considered if  $P <$   
219  $0.05$ , as determined using the psych package in R with the  $P$  value adjusted using the  
220 Benjamini-Hochberg method. Overlapping microorganisms obtained from the  
221 Wilcoxon rank-sum test and Spearman's  $r$  and Pearson's  $r$  were considered to have a  
222 potential relationship with EN300. We subsequently characterized EN300-associated  
223 microbes in the six sites.

224

## 225 **Whole-genome sequencing data processing**

226 To avoid analysis noise caused by sequencing errors, low-quality paired reads (reads  
227 with  $\geq 10\%$  unidentified nucleotides [N];  $> 10$  nt aligned to the adaptor, allowing  $\leq 10\%$   
228 mismatches;  $> 50\%$  bases having phred quality  $< 5$ ; and putative PCR duplicates  
229 generated in the library construction process), which mainly resulted from base-calling  
230 duplicates and adaptor contamination, were removed using an in-house script [32].  
231 Consequently, 1.30 terabases ( $\sim 10.15$ -fold per individual) of high-quality paired-end  
232 reads were obtained, including 95.13% and 88.98% nucleotides with phred quality  $\geq$   
233 Q20 (with an accuracy of 99.00%) and  $\geq$ Q30 (with an accuracy of 99.90%),  
234 respectively (**Supplementary Table S3**).

235

## 236 **Read mapping, and genomic variant calling and annotation**

237 The remaining high-quality reads of each individual were aligned to the reference  
238 chicken genome (Gallus\_gallus-6.0 Ensembl release 94,  
239 [http://asia.ensembl.org/Gallus\\_gallus/Info/Index/](http://asia.ensembl.org/Gallus_gallus/Info/Index/)) using the Burrows-Wheeler  
240 Alignment tool (BWA) (version 0.7.15) [33] with the command ‘mem -t 10 -k 32’.  
241 BAM alignment files were then generated using SAMtools (version 0.1.19) [33].  
242 Additionally, we improved alignment performance through filtering the alignment  
243 reads with mismatches  $\leq 5$  and mapping quality = 0. After sorting by SAMtools, the  
244 sorted BAM file was marked in duplicate using the command “MarkDuplicates” in the  
245 package Picard (version 1.119).

246 Subsequently, we performed gVCF calling in accordance with the Genome Analysis  
247 Toolkit (GATK) best practices pipeline (version v3.7) [34] using the HaplotypeCaller-  
248 based method, and then population single nucleotide polymorphism (SNP) calling by  
249 merging all gVCFs with the commands “CombineGVCFs”.

250 To obtain high-credibility SNPs, we applied the hard filter command  
251 ‘VariantFiltration’ to exclude potential false-positive variant calls as follows: (a) quality  
252 by depth  $> 10.0$ ; (b) mapping quality score  $> 40.0$ ; (c) FS  $< 60.0$ ; (d) MQRank-Sum  $>$   
253  $-12.5$ ; (e) ReadPosRankSum  $> -8.0$ . In addition, the filter variants were further filtered  
254 when more than three SNPs clustered within a 10-bp window were removed [35].  
255 Finally, we used vcftools (version 0.1.15) to obtain biallelic variants with the following  
256 parameters: sample call rate  $> 90\%$ , SNP call ratio  $> 95\%$ , minor allele frequencies  $>$   
257  $1\%$ , and Hardy-Weinberg equilibrium  $P$  value  $< 10^{-5}$ . Ultimately, a total of 10.82 M  
258 high-credibility SNPs in 128 individuals were retained (**Supplementary Table S4**).

259 SNPs were classified into different genomic regions (i.e., exonic, intronic, splice sites,  
260 upstream and downstream around gene regions, and intergenic) using the ANNOVAR  
261 package [36].

262

### 263 **Construction of microbial relationship and host genetic relatedness matrices**

264 OTUs identified in each site were normalized to a zero mean and unit variance. We then  
265 constructed a microbial relationship matrix (MRM) [37] using an R script based on the  
266 following equation:

$$267 \quad r_{tij} = \frac{1}{N_T} \sum_{o=1}^{N_T} \frac{(a_{tio} - \bar{t}_{to})(a_{tjo} - \bar{a}_{to})}{\sigma_{to}^2}$$

268 where  $r_{tij}$  represents the tested microbial relationship in tract t between chickens i and  
269 j;  $a_{tio}$  and  $a_{tjo}$  are the abundance of OTU o in tract t in chickens i and j,  
270 respectively;  $\bar{t}_{to}$  is the average relative abundance of OTU o in tract t in the  
271 population;  $\sigma_{to}^2$  is the variance in the abundance of OTU o in tract t; and  $N_T$  is the total  
272 number of OTUs in tract t used for the computation of relatedness. High-quality SNPs  
273 were further used to detect independent markers using PLINK [38], with the following  
274 parameters: 50 kb window size, 10 SNPs per step, and 0.2 as a squared Pearson's  $r$  ( $r^2$ ).  
275 All 10,809,968 SNPs were used to compute the principal components (PCs) and genetic  
276 relatedness matrix (GRM) [39] using GCTA version 1.91.1 [40]:

$$277 \quad h_{ij} = \frac{1}{N} \sum_{a=1}^N \frac{(r_{ia} - 2\bar{f}_a)(r_{ja} - 2\bar{f}_a)}{2\bar{f}_a(1 - \bar{f}_a)}$$

278 where  $h_{ij}$  is the tested genetic relationship between chickens i and j;  $r_{ia}$  and  $r_{ja}$   
279 represent the number of reference alleles in chickens i and j, respectively;  $\bar{f}_a$  is the

280 frequency of the reference allele in the population; and N is the number of variants.

281

## 282 **Heritability ( $h^2$ ) analysis**

283 To estimate the effects of host genetics on the microbiota at different sites, we computed  
284 the correlation between GRM and BC distances at each site using both Pearson's  $r$  and  
285 Spearman's  $r$ , based on Mantel tests with 10,000 permutations. The correlation between  
286 GRM and MRM was also computed. To estimate the correlation between GRM and the  
287 microbiota community, we computed heritability at OTU, genus, and species levels.  
288 OTU abundance information was normalized using a standard sequence number  
289 corresponding to the sample with the least number of sequences. Microorganisms that  
290 were present in  $< 60\%$  but  $\geq 20\%$  of the samples were dichotomized as present or absent  
291 [41], and the microorganisms that were detected in  $< 20\%$  of the samples from each site  
292 were excluded from the analysis.

293

## 294 **Genetic and microbial parameters of egg production**

295 As the individuals examined in this study had no pedigree information, we computed  
296 the SNP-based heritability of the egg production phenotype (i.e., EN300) instead, using  
297 the following model [39]:

$$298 \quad y = K_c + g + e[A]$$

299 where  $y$  is an observed value (EN300);  $c$  is a vector of fixed covariates with the  
300 corresponding design matrix  $K$ ;  $e$  is the residual effect; and  $g$  is a vector of aggregate  
301 effects of all SNPs with an  $\sim N(0, G_{\sigma_A^2})$ , where  $G$  and  $\sigma_A^2$  are the GRM and polygenetic  
302 variance (overall SNP effects), respectively. The top five host genetic PCs were



303 considered covariates in the model to account for the calculated population stratification,  
304 as described above. The likelihood ratio test  $P$  value was calculated to examine the  
305 significance of the association between SNPs and EN300.

306 The fraction of EN300 variance explained by microbial variance was calculated as  
307  $m^2 = \frac{\sigma_m^2}{\sigma_p^2}$ , (called ‘microbiability’ [ $m^2$ ] in animals [37] and ‘microbiome-association  
308 index’ in humans [16]), where  $\sigma_m^2$  and  $\sigma_p^2$  are the phenotypic variance and microbial  
309 variance, respectively. To adjust for host genetic effects, all valid individuals and SNPs  
310 were used in a GWAS with a univariate linear mixed model (LMM), which was  
311 performed using GEMMA [42]. The LMM was calculated as follows:

$$312 \quad y = K_c + m_s + e \quad [B]$$

313 where the model parameters are the same as those described in model [A], except  $m_s$ ,  
314 which is the random effect of the microbiota in locations following the multinomial  
315 distribution  $m_s \sim N(0, M\sigma_m^2)$ , and  $M$  is the MRM. We then used the MRM in GCTA to  
316 calculate  $m^2$ . The genome-wide significance threshold was  $10^{-6}$ . We then extracted  
317 these SNPs with significant effects on EN300 and calculated the PCs using PLINK.  
318 The first two PCs and the top five host genetic PCs were then used as covariates in  
319 model [B] to account for host genetics.

320

### 321 **RNA sequencing (RNA-seq) analysis**

322 For RNA-seq, total RNA was extracted from uterine tissue of twelve hens (six for each  
323 of the groups with either the 20% lowest or 20% highest EN300 values) using the  
324 RNeasy Mini Kit (Qiagen). We used an rRNA depletion protocol (Ribo-Zero kit,

325 Epicenter) coupled with the Illumina TruSeq stranded RNA-seq library protocol to  
326 construct the RNA-seq libraries. A total of 12 libraries were quantified using the Qubit  
327 dsDNA High Sensitivity Assay Kit (Invitrogen) and separately sequenced on the  
328 NovaSeq 6000 platform (Illumina) to produce an average of ~31.86 M 150-bp paired-  
329 end raw reads and ~30.52 M high-quality reads for each library. Sequence reads were  
330 aligned to the chicken reference genome (Gallus\_gallus-6.0 Ensembl release 94) by the  
331 STAR alignment tool (version 2.5.3a). On average, ~96% of reads of individual  
332 libraries were aligned to the chicken reference genome, generating an average of 29.30  
333 M aligned reads for each sample. The gene expression level was then estimated as  
334 transcripts per million (TPM) using the high-speed transcript quantification tool  
335 Kallisto (V0.43.0) [43].

336 We used the edgeR package [44] to identify differentially expressed genes ( $FDR <$   
337  $0.01$  and  $|\log_2(\text{fold change})| \geq 1$ ) between the two groups with either the 20% lowest or  
338 20% highest EN300 values. Functional enrichment analysis of differentially expressed  
339 genes was performed using the Metascape tool [45]. Only Gene Ontology (GO) terms  
340 and Kyoto Encyclopedia of Genes and Genomes (KEGG) pathways with a  $P$  value  $<$   
341  $0.05$  were considered significant and are listed.

342 The expression levels of eight genes were detected using a quantitative PCR (q-PCR)  
343 approach. The  $\beta$ -actin gene of chicken was used as an endogenous control gene.  
344 Relative expression levels of objective mRNAs were calculated using the  $\Delta\Delta C_t$  method.  
345 The primer sequences used for q-PCR are shown in **Supplementary Table S5**. All  
346 measurements contained a negative control (no cDNA template), and each RNA sample

347 was analyzed in triplicate.

348

## 349 **Results and Discussion**

### 350 **Discriminative characteristics of microbiota in reproductive and digestive tract** 351 **sites**

352 Sequencing of the 16S rRNA gene in 768 samples generated a total of ~57.61 M high-  
353 quality reads (~75.01 K reads per sample). *De novo* clustering after singleton removal  
354 produced 46,480 OTUs at an identity cutoff of 97%, among which 6,776 OTUs found  
355 in > 20% of samples were used for subsequent analysis. We performed alpha diversity  
356 analysis based on qualified sequencing depth with an average Good's coverage of  
357 98.69% (ranging from 96.30-99.60%) (**Supplementary Fig. S2a**). Analysis of five  
358 indices (i.e., observed OTUs, Chao1, Shannon, Simpson, and ACE) (**Supplementary**  
359 **Fig. S2b-g**) indicated that the vast majority of pairwise comparisons between sites (10  
360 of 90 pairwise comparisons, or 11.11%) showed significant differences ( $P < 0.001$ ,  
361 Wilcoxon rank-sum test), with the exception of two comparisons (uterus vs. isthmus  
362 for all indices; and small intestine vs. vagina for the observed OTUs, Shannon, and  
363 Simpson indices) (**Supplementary Fig. S2h, i**).

364 Compared to the digestive system, the reproductive system exhibited higher alpha  
365 diversity (all five indices) and thus contained more microbial taxa, especially in the  
366 upper reproductive tract (i.e., uterus and isthmus) (**Fig. 1a, b**). Similar to significant  
367 microbiota differences between the vaginal and upper reproductive tracts in humans [7,  
368 46], we found highly discriminative microbial communities in chickens between the  
369 upper (isthmus and uterus) and lower (vagina) reproductive tracts (isthmus vs. vagina,  
370  $R = 0.473$ ,  $P < 0.001$ , ANOSIM; uterus vs. vagina,  $R = 0.496$ ,  $P < 0.001$ , ANOSIM),

371 but indistinguishable microbiota between the isthmus and uterus (isthmus vs. uterus,  $R$   
372 = -0.003,  $P = 0.694$ , ANOSIM) (**Supplementary Table S6**). These results  
373 demonstrated microbiota heterogeneity throughout contiguous sites of the digestive and  
374 reproductive tracts in hens.

375 We used PCoA to visualize differences in taxa composition between microbiota in  
376 the reproductive and digestive tracts. The first principal component, explaining 34.96%  
377 of the variance in weighted UniFrac distance matrices among the samples, separated  
378 reproductive and digestive tract samples (**Fig. 1c**). Given that reproductive and  
379 digestive tracts share a common exit in the cloaca, the frequently exchanged  
380 microbiome likely resulted in similar microbiota at the distal end of both tracts.  
381 Consequently, we found that the vagina acquired microbe communities from the  
382 isthmus and uterus, which all belong to the reproductive tract. Nonetheless, the vagina  
383 microbiota was partially indistinguishable from that of the small intestine (**Fig. 1c**). The  
384 unweighted UniFrac distance matrices (**Supplementary Fig. S2j**) and an ANOSIM  
385 based on BC distances (**Supplementary Table S6**) recapitulated these findings.

386 Similar phyla dominated the microbiota in the six sites; *Firmicutes*, *Proteobacteria*,  
387 and *Cyanobacteria* accounted for 71.45% - 97.86% of all OTUs. Nonetheless, some  
388 differences were observed among the sites. *Cyanobacteria* was the dominant phylum  
389 in the gizzard (48.19% of the total abundance); however, *Firmicutes* was the most  
390 abundant phylum (43.60% to 78.93%) in the other five sites. We also found that the  
391 uterus and isthmus had similar dominant phyla, including *Firmicutes* (44.87% and  
392 43.60%), *Proteobacteria* (26.25% and 23.77%), and *Bacteroidetes* (17.13% and  
393 19.52%) (**Supplementary Fig. S2k**). Strikingly, the vagina had the highest abundance  
394 of *Fusobacteria* (11.51%) among the six sites.

395 At the genus level, *Lactobacillus* (7.24% - 73.74% in the six sites), *Exiguobacterium*  
396 (2.79% - 4.68%), *Stenotrophomonas* (1.01% - 6.54%), and *Bacteroides* (3.40% -  
397 4.86%) were ubiquitously found across all sites with higher abundances than other  
398 bacteria due to their broad adaptability and beneficial functions (**Fig. 1a**). Supporting  
399 the well-documented protective role of *Lactobacillus* by lowering the environmental  
400 pH through lactic acid production, we found *Lactobacillus* to be more dominant in the  
401 digestive tract (73.74% in crop, 24.76% in gizzard, 30.70% in small intestine) compared  
402 with the reproductive tract (7.24% in vagina, 9.27% in uterus, 9.91% in isthmus). The  
403 digestive tract had a lower pH than the reproductive tract where an alkaline pH is  
404 needed to maintain sperm motility [47, 48]. *Unidentified Erysipelotrichaceae*,  
405 *Unidentified Chloroplast*, *Lactobacillus*, and *Bacteroides* had abundances of >1.0% in  
406 the vagina, which was further increased in the uterus and isthmus (**Fig. 1a**).

407 Furthermore, 14.63% of genera (362 of 2,475) demonstrated associations between  
408 sites ( $P < 0.05$  of Spearman's  $r$ , Z-test) (**Supplementary Fig. S2l**). Typically, genera  
409 belonging to *Proteobacteria* and *Firmicutes* showed significantly positive correlations  
410 ( $P < 0.001$ , Z-test) between the crop and gizzard, the gizzard and small intestine, or the  
411 three reproductive tract sites.

412

### 413 **Site-associated microorganisms in reproductive and digestive tracts**

414 We analyzed the functional capacity of the microbiota in each reproductive and  
415 digestive tract site using PICRUSt2, and found that 72.00% of the representative  
416 pathways (36 of the top 50 KEGG pathways) were shared across the six sites, one third  
417 of which (12 of 36) were primarily involved in metabolism (**Supplementary Fig. S3a,**  
418 **b**). Specifically, 'bacterial secretion system' and 'bacterial chemotaxis' were enriched

419 in the reproductive tract. A previous study found that successful bacterial pathogens  
420 evolved versatile protein secretion systems to promote their survival and fitness in  
421 response to different environmental challenges, and to modulate host immunity [49].  
422 Seven pathways were specifically enriched at a site (three of six were site-specific to  
423 crop and gizzard, and ‘riboflavin metabolism’ was specific to vagina). Abundances of  
424 the OTUs involved in these pathways differed among the six sites ( $P < 0.001$ , Wilcoxon  
425 rank-sum test) (**Supplementary Table S7**). For example, the microbial community of  
426 the small intestine had important roles in ‘valine, leucine, and isoleucine biosynthesis’,  
427 as indicated by the moderate row  $Z$  scores (-0.66) for each pathway. Moreover,  
428 ‘propanoate metabolism’ ( $Z$  score = 1.72) and ‘bacterial chemotaxis’ ( $Z$  score = 1.53)  
429 were overrepresented in the vagina. Meanwhile, ‘bacterial secretion system’ was  
430 overrepresented only in the uterus ( $Z$  score = 1.29) and isthmus ( $Z$  score = 0.94)  
431 compared with the vagina and the three digestive tract sites (**Fig. 2a**).

432 We next identified 65 site-associated bacterial taxa among the six sites using LEfSe;  
433 [31] (**Fig. 2b and Supplementary Fig. S3c**), which confirmed most of the observations  
434 described above (i.e., the uterus and isthmus showed essentially similar microbiota). Of  
435 note, *Helicobacter* and *Unidentified Erysipelotrichaceae*, which were associated with  
436 the small intestine, showed the highest abundance among the six sites (**Fig. 2b**). Six  
437 genera from *Lactobacillaceae* were crop-associated bacteria. In chicken, the crop acts  
438 as a reservoir for the storage of food prior to its digestion, where food mixes with many  
439 beneficial *Lactobacillus* bacteria (73.84% at the genus level) that produce lactic acid  
440 before moving on to the proventriculus [50]. Next, the gizzard grinds any remaining  
441 large food particles with the assistance of grit, releasing abundant *Unidentified*  
442 *Chloroplast* (2.94%) and mitochondria-like (2.37%) microbes from plant consumption.  
443 The small intestine exhibited the most abundant microbes of the three digestive tract

444 sites, which is mainly where further digestion occurs, and fermentation begins.  
445 *Paenibacillaceae* species, with optimum growth at pH 6.0-7.0, were also  
446 overrepresented. *Helicobacter* specifically inhabits the small intestine in chicken to  
447 maintain near neutral pH and a microaerophilic environment, and may be involved in  
448 inflammation, metabolism, and neutralization of gastric acid [51]; whether this is  
449 beneficial or harmful remains largely unknown.

450 *Unidentified Erysipelotrichaceae* showed higher abundance in the three reproductive  
451 tract sites (1.83% - 2.40%). Bacteria associated with the isthmus and uterus both  
452 showed higher abundance than in the other sites. Several genera (typically, *Romboutsia*,  
453 *Fusobacterium*, and *Clostridium sensu stricto 1*) were dominant in the vagina (> 25%  
454 of the microbiota) but had lower abundance in the other sites (**Fig. 2a**). Among these,  
455 *Romboutsia* has been negatively associated with body weight, fasting serum glucose,  
456 and insulin in mice [52]. *Fusobacterium* is considered a proinflammatory organism in  
457 humans [53]. *Clostridium* is reportedly capable of utilizing a broad range of organic  
458 substrates for efficient hydrogen production [54], thus adjusting the pH of the host.  
459 *Gammaproteobacteria* and *Betaproteobacteria* were uterus-associated (LDA > 4); the  
460 abundances of these two bacterial taxa changed in immune-suppressed honey bees  
461 emerging from *Varroa*-infested colonies [55]. Six Bacteroidetes bacterial taxa were  
462 isthmus-associated; *Bacteroides* species are thought to play a vital role in the  
463 breakdown of polysaccharides into simpler compounds related to host immunity.

464 Taken together, we speculate that the reproductive tract microbiota plays a vital role  
465 in improving protective immunity, defending against invasion of the reproductive tract  
466 by harmful bacteria, and pH adaptation. These findings confirm that the digestive and  
467 reproductive tract microbiota in chicken are primarily determined by the physiological  
468 function of each compartment within these systems.

469

470 **Weak association between host genetics and microbial communities**

471 In order to explore the relationship between host genome and microbiome of six sites,  
472 we generated a total of 1.76 tera bases of high-quality genome sequences from 128  
473 chickens with ~10.15-fold average depth for each individual (**Supplementary Table**  
474 **S3**), and identified a total of 10.82 M SNPs with a density of ~10.29 SNPs per kb.

475 The correlation between host genetics (using GRM) and microbial beta diversity  
476 based on BC distance at the six sites in the same cohort of laying hens was not  
477 statistically significant ( $|r| < 0.033$ ,  $P > 0.05$ , Mantel test, **Fig. 3a-f and Supplementary**  
478 **Table S8**). Nonetheless, the microbiomes of anatomically neighboring sites were  
479 similar. Typically, the microbial communities of the isthmus were positively correlated  
480 with those of the neighboring uterus (Spearman's  $r = 0.426$ ,  $P < 0.0001$ , Mantel test),  
481 but not significantly associated with the relatively distant crop (Spearman's  $r = 0.019$ ,  
482  $P = 0.335$ , Mantel test, **Supplementary Table S8**). We also estimated the association  
483 between GRM and MRM, and obtained similar results: both Pearson's and Spearman's  
484 correlations suggesting that host genetics and the microbiota composition are weakly  
485 associated (**Supplementary Table S8**).

486 We next regarded the abundance of each microorganism as a quantitative trait to  
487 estimate the  $h^2$  of each microorganism at the species, genus, and OTU level.  
488 Microorganisms in  $> 20\%$  but  $< 60\%$  of samples (**Supplementary Fig. S4a, b**) were  
489 analyzed qualitatively as dichotomous traits (**Fig. 3g-i**). At the species and genus levels,  
490 no significant correlation ( $P > 0.05$ , Wilcoxon rank-sum test) was found between the  
491 presence of a SNP and the presence of a specific microbe (**Fig. 3j-l**) in the crop. Three  
492 species in the small intestine (accounting for 0.21% of the tested small intestine



493 microbiota), six in the vagina (0.39%), 14 in the uterus (0.92%), and ten in the isthmus  
494 (0.66%) exhibited significant SNP-based heritability ( $P < 0.05$ , Wilcoxon rank-sum  
495 test) (**Supplementary Table S9**). Most of these heritable bacteria belonged to the  
496 *Firmicutes* phylum (**Supplementary Fig. S4c, e, g**). Reproductive tract sites had more  
497 heritable bacterial phyla than digestive tract sites (**Supplementary Fig. S4d, f, h**). The  
498 cumulative abundances of these heritable bacteria were only 0.22%, 4.14%, 1.46%, and  
499 1.61% ( $P < 0.05$ , Wilcoxon rank-sum test) in the small intestine, vagina, uterus, and  
500 isthmus, respectively (**Fig. 3n and Supplementary Table S9**). Similar results were  
501 observed at the genus and OTU levels (**Fig. 3m, o**). These results supported that host  
502 genetics have limited effect on shaping the microbial composition of the reproductive  
503 and digestive tracts.

504

#### 505 **Heritability ( $h^2$ ) and microbiability ( $m^2$ ) of EN300**

506 To further explore the effect of genome and microbiome on EN300, we used a GRM  
507 of sample pairs to estimate the  $h^2$  value of EN300 explained by whole genome SNPs  
508 using the restricted maximum likelihood method. We found that EN300 exhibited  
509 relatively low to medium heritability ( $h^2 = 0.282$ ,  $P = 0.048$ , likelihood ratio test), which  
510 was comparable to previous estimations (**Supplementary Table S10**) [5, 6]. The  
511 fraction of EN300 variance explained by microbial variance was measured by  
512 microbiability ( $m^2$ ) [16]. After correcting for host genetic factors using EN300-related  
513 SNPs as additional covariates, we found that the estimated EN300  $m^2$  values for  
514 digestive tract sites (0.523 for small intestine, 0.869 for crop, and 0.873 for gizzard)  
515 were lower than those for reproductive tract sites (0.923 for vagina, 0.936 for uterus,  
516 and 0.989 for isthmus) (**Table 1**). Generally, higher EN300  $m^2$  values were observed

517 for sites neighboring the ovaries; the isthmus was the most pertinent site with respect  
 518 to egg production. Commercial egg producers are acutely interested in hen oviducts  
 519 because pathological changes or disrupted activity directly affect egg production  
 520 efficiency and ultimately decrease economic profitability [56]. In chickens, the inner  
 521 and outer shell membranes form in the isthmus, while calcification of the eggshell,  
 522 subsequent pigmentation, and cuticle deposition occur in the uterus and is followed by  
 523 expulsion of the egg through the vagina [57]. These results suggest that EN300 in layer  
 524 chickens is determined more by the microbiota in the reproductive tract than in the  
 525 digestive tract.

526 **Table 1 Estimated microbiability ( $m^2$ ) of EN300**

|                           | <b>Site</b>     | <b><math>m^2</math></b> | <b>Standard error</b> | <b><math>P</math> value</b> |
|---------------------------|-----------------|-------------------------|-----------------------|-----------------------------|
|                           | Crop            | 0.869                   | 0.049                 | $< 10^{-16}$                |
| <b>Digestive tract</b>    | Gizzard         | 0.873                   | 0.045                 | $< 10^{-16}$                |
|                           | Small intestine | 0.523                   | 0.111                 | $2.56 \times 10^{-11}$      |
|                           | Isthmus         | 0.989                   | 0.011                 | $< 10^{-16}$                |
| <b>Reproductive tract</b> | Uterus          | 0.936                   | 0.030                 | $< 10^{-16}$                |
|                           | Vagina          | 0.923                   | 0.028                 | $< 10^{-16}$                |
| <b>Host genetics</b>      |                 | 0.282                   | 0.231                 | 0.049                       |

527

528 **Microorganisms in the reproductive tract are significantly associated with EN300**

529 We next focused on the microorganisms which are highly associated with EN300. The  
 530 results showed that most of the microorganisms detected at the microbial species,  
 531 genus, and OTU levels that significantly associated with EN300 belonged to the  
 532 *Firmicutes* phylum ( $P < 0.05$ , Wilcoxon rank-sum test) (**Supplementary Fig. S5**). Only  
 533 microorganisms that exhibited a significant correlation between egg production and

534 relative abundance as determined by both Pearson's  $r$  and Spearman's  $r$  were  
535 considered a causal relationship ( $P < 0.05$ , Wilcoxon rank-sum test) Consequently, 39  
536 OTUs, 26 genera, and 24 species fulfilled these criteria (**Fig. 4a and Supplementary**  
537 **Fig. S6a**).

538 Most OTUs, genera, and species present in the three digestive tract sites were  
539 negatively correlated (Pearson's  $r$ ) with egg production (negative/positive: 19/6, 8/8  
540 and 16/5, respectively), whereas they were positively correlated with egg production in  
541 the reproductive tract sites (positive/negative: 13/9, 11/10 and 13/4, respectively) (**Fig.**  
542 **4b and Supplementary Fig. S6b, c**). Microorganisms in the uterus were most strongly  
543 correlated with each other (**Fig. 4c and Supplementary Fig. S7**), which implied a  
544 strong symbiotic/competitive relationship.

545 At the genus level, *Lactobacillus*, *Bacteroides*, and *Desulfovibrio* were positively  
546 correlated with EN300 in the three reproductive tract sites. *Pseudomonas*,  
547 *Exiguobacterium*, and *Unidentified Erysipelotrichaceae* were negatively correlated  
548 with EN300 in the three reproductive tract sites, but were positively correlated in the  
549 three digestive tract sites (**Supplementary Fig. S6b**).

550 At the species level, *Bacteroides fragilis*, *B. salanitronis*, *B. barnesiae*, and *C. leptum*  
551 were positively correlated with EN300 in the three reproductive tract sites, but were  
552 weakly negatively correlated with EN300 in the small intestine, while no correlation  
553 was found in the crop and gizzard. The first three species belong to the genus  
554 *Bacteroides*, which had a significantly positive correlation with egg production in the  
555 three reproductive sites (Pearson's  $r = 0.403 - 0.479$ ). *Bacteroides* species have been  
556 identified as the predominant anaerobic genera in chicken cecum [58], which were  
557 thought to play an important role in the breakdown of polysaccharides into simpler

558 compounds used by the animal host as well as the microorganisms themselves [59].  
559 Intestinal anaerobic bacteria such as *B. fragilis* and *B. salanitronis* have been suggested  
560 to possess metabolic pathways for N-glycan production [60]. The symbiont *B. fragilis*  
561 exists in a commensal relationship with the host as it expresses a relatively large number  
562 of genes involved in polysaccharide metabolism, which benefits the host. The surface  
563 of *B. fragilis* can produce polysaccharides; in particular, capsular polysaccharide A  
564 (CPSA) is a key mediator of mammalian immune system development [61].  
565 Surprisingly, CPSA has also been shown to exert protective effects in autoimmune  
566 disorder models, such as antibiotic-induced experimental encephalomyelitis. It is thus  
567 suggested that the genus *Bacteroides* could regulate reproductive activity by mediating  
568 the avian immune system.

569

570 *Firmicutes* bacterium ZOR0006 had a significantly negative correlation with EN300  
571 in the three reproductive tract sites and a significantly positive correlation in the three  
572 digestive tract sites. The 20% of chickens with the lowest EN300 values (mean = 37.13)  
573 had significantly lower *B. fragilis*, *B. salanitronis*, *B. barnesiae*, and *C. leptum*  
574 abundances ( $P < 0.05$ , Wilcoxon rank-sum test) (**Supplementary Fig. S8a, b**)  
575 compared with the highest EN300 values (mean = 113.75) of the 20% of chickens in  
576 the reproductive tract sites. Although its function is unknown, 20% of chickens with  
577 the highest abundance of *Firmicutes* bacterium ZOR0006 exhibited significantly lower  
578 EN300 values than the 20% of chickens with the lowest abundance of this  
579 microorganism (**Fig. 5a**) ( $P < 0.05$ , Wilcoxon rank-sum test) in the reproductive tract  
580 sites.

581 Moreover, the 20% of chickens with the highest *B. fragilis*, *B. salanitronis*, *B.*

582 *barnesiae*, and *C. leptum* abundances exhibited significantly higher EN300 values than  
583 the 20% of chickens with the lowest abundances of these microorganisms in the  
584 reproductive tract sites, with the exception of *C. leptum* abundance in the vagina (**Fig.**  
585 **5a**). *C. leptum*, a major member of the *Firmicutes* phylum, can alter the gut microbiota  
586 in rats, especially in obese individuals. In human infants, fecal levels of *C. leptum* were  
587 found to be negatively correlated with proinflammatory marker levels [62]. Colonic  
588 colonization of *C. leptum* was associated with accumulation of regulatory T cells, which  
589 inhibited the development of inflammatory lesions. The proliferation and activation of  
590 regulatory T cells is crucial to establishing and maintaining an appropriate level of  
591 immune tolerance. In addition, our results demonstrated that *C. leptum* was associated  
592 with a large range of other uterus or isthmus microbiota constituents (but limited  
593 association was observed with digestive microbiota constituents) and was not  
594 influenced by host genetics. Thus, this microorganism might serve as a stimulator of  
595 regulatory T cell production and inhibitor of inflammatory lesions, then regulating and  
596 maintaining immunologic tolerance and microbiota composition of the reproductive  
597 tract (especially the uterus and isthmus). These results suggest that the microbial species  
598 contribute to the enhanced egg production are modulated by influencing the immune  
599 processes.

600 We then characterized the spatial distribution of these five EN300-associated  
601 microorganisms (*B. fragilis*, *B. salanitronis*, *B. barnesiae*, *C. leptum*, and *Firmicutes*  
602 bacterium ZOR0006). *B. fragilis* was detected in almost all samples and accounted for  
603 0.05% - 1.29% of the total abundance (**Fig. 5b**). *B. salanitronis* and *B. barnesiae* were  
604 detected at similar ratios in the six sites and in most samples from the reproductive tract  
605 sites; both accounted for the highest abundance in the vagina. *Firmicutes* bacterium  
606 ZOR0006 was also detected in most samples from the reproductive tract sites (74.22%

607 - 89.84%) and in half of the samples from the digestive tract sites (48.44% - 58.59%),  
608 accounting for 0.61% - 2.40% of the total abundance. Although the detection ratio  
609 (28.13% - 64.84%) and relative abundance of *C. leptum* were much lower than those of  
610 other microorganisms in all six sites, they accounted for the highest abundance in the  
611 isthmus and uterus (**Fig. 5b**).

612

### 613 **Transcriptomic divergence in the uterus between hens with high and low egg** 614 **production**

615 To test whether microorganisms influence egg production by modulating immune  
616 processes, we compared the transcriptional profiles in the uterus between the two  
617 groups composed of hens with either the 20% lowest or 20% highest EN300 values (six  
618 hens for each group). As expected, the correlation rates between the high- and low-egg  
619 production groups (mean Pearson's  $r = 0.93$ ) were relatively lower than those between  
620 biological replicates (mean Pearson's  $r = 0.95$  and  $0.96$  for groups with high and low  
621 egg production, respectively) (**Fig. 6a, b**), indicating significant biological differences  
622 between groups. We identified 1,051 genes that exhibited significant expression  
623 changes ( $FDR \leq 0.01$  and  $|\log_2(\text{fold change})| \geq 1$ ) between groups with high and low  
624 egg production (**Fig. 6c**), which are mainly involved in immune-related categories,  
625 including the 'NF- $\kappa$ B signaling pathway' and 'chronic inflammatory response'  
626 (**Supplementary Fig. S9**). Of these, 739 genes that were significantly downregulated  
627 in the high-egg production group were overrepresented in the categories related to the  
628 inflammatory response, including 'T cell costimulation', 'B cell receptor signaling  
629 pathway' and 'lymphocyte activation' (**Fig. 6e**). Notably, we observed eight well-  
630 documented inflammatory markers (two Toll-like receptors [*TLR15* and *TLR1A*] and

631 six interleukins [*IL21R*, *IL18RAP*, *IL22RA2*, *IL411*, *IL17REL* and *IL8*) (**Fig. 6c, d**) that  
632 were significantly downregulated in the uterus of the high-egg production group  
633 compared to the low-egg production group. Because ectopic expression of these  
634 inflammatory genes in the endometrium has been associated with the development of  
635 endometritis and thus results in infertility and subfertility [63-65], repressive  
636 transcription of these genes is beneficial for egg production. This result suggests the  
637 possible mechanism by which the downregulated expression of well-documented  
638 inflammatory markers suppresses the inflammatory response (and thus may contribute  
639 to the benign immune state) in reproductive tracts, which potentially benefits egg  
640 production. Functionally, the microbiota of the uterus affect the health of the oviduct  
641 and thus influence chicken egg production, which is manifested as increased pathway  
642 abundance for bacterial motility proteins, the bacterial secretion system, and membrane  
643 and intracellular structural molecules.

644

## 645 **Conclusion**

646 Our study provides a comprehensive view of the microbiome succession in the  
647 digestive and reproductive tracts of layer chickens. The diversity, composition, and  
648 predicted function of the microbiota varied considerably according to location within  
649 the reproductive and digestive tracts. Our results indicate that the reproductive tract  
650 microbiota in the hen influences egg production more than the digestive tract  
651 microbiota, and host genome has limited effect on their microbial composition. A small  
652 proportion of the variability in egg production was associated with the microbiota in  
653 the reproductive and digestive tracts of chickens. Remarkably, the genus *Bacteroides*  
654 and the species *C. leptum* and *Firmicutes* bacterium ZOR0006 were strongly associated  
655 with egg production, indicating their potential role in promoting reproductive

656 performance. Reproductive tract bacterial species could suppress the inflammatory  
657 response and thus potentially benefit for the egg production. These findings provide  
658 new insight into the roles of reproductive and digestive tract microbiota for complex  
659 traits, and may help contribute to the development of effective therapies for improving  
660 commercial egg production in chickens.

661

## 662 **Figure Legends**

663 **Figure 1.** Diversity and composition of the reproductive and digestive tract microbiota  
664 in chickens. **(a)** Relative abundance of the microbiota from six sites at the genus level.  
665 Only genera with an abundance > 1% in a site are shown. **(b)** Alpha diversity  
666 comparison based on the Shannon diversity index (\* $P < 0.05$ ; \*\* $P < 0.01$ , Wilcoxon  
667 rank-sum test). **c.** Principal coordinates analysis of the 768 samples based on weighted  
668 UniFrac distances. 34.96% of variance was explained for component 1 ( $P < 0.05$ ,  
669 Tracy-Widom test) and 24.23% for component 2 ( $P < 0.05$ , Tracy-Widom test).

670 **Figure 2.** Comparison of predicted functional capacities and site-associated taxa of  
671 microbial communities. **(a)** Heatmap showing the predicted KEGG pathways and their  
672 abundances at reproductive and digestive tract sites (Supplementary Table S7).  $Z$  scores  
673 indicate the means of KEGG pathway abundances. **(b)** Heatmap showing the 65 site-  
674 associated bacterial taxa identified by LEfSe (LDA > 4).  $Z$  scores indicate the relative  
675 abundances of site-associated bacterial taxa. Black frames represent site-associated  
676 bacterial taxa whose  $Z$  scores of relative abundances differed significantly among the  
677 six sites. p, phylum; c, class; o, order; f, family; g, genus.

678 **Figure 3.** Effect of host genetics on microbiota of the reproductive and digestive tracts.  
679 **(a-f)** Density scatter plots of genetic kinship of pairs of individuals (x axis) and their



680 microbiome dissimilarity (y axis) among all pairs of individuals ( $n = 16,256$ ). NS, not  
681 significant ( $P > 0.05$ ; Mantel test). **(g-i)** Distribution of species, genera, and OTUs  
682 identified in six sites for all chickens. Microorganisms present in  $< 20\%$  of samples  
683 were excluded. **(j-l)** Proportion of heritable microbial genera, species, and OTUs in  
684 each site. **(m-o)** Cumulative relative abundances of heritable microbial genera, species,  
685 and OTUs in each site.

686 **Figure 4.** Microorganisms associated with egg number at 300 days of age (EN300). **(a)**  
687 Microbial species associated with EN300 ( $P < 0.05$ ) among the six sites. **(b)** Pearson's  
688  $r$  values between EN300 and 24 EN300-associated microbial species; only significant  
689  $r$  values are given numerically ( $P < 0.05$ ). **c** Pearson's  $r$  (lower diagonal) and  
690 Spearman's  $r$  (upper diagonal) values among microbial species in the uterus (UT);  
691 significant  $r$  values are given numerically ( $P < 0.05$ ).

692 **Figure 5.** Effect of microbial species associated with EN300. **(a)** EN300 values for the  
693 20% of chickens with the highest and lowest abundances of *B. fragilis*, *B. salanitronis*,  
694 *B. barnesiae*, *C. leptum*, and *Firmicutes* bacterium ZOR0006 in the three reproductive  
695 tract sites. The plots show the median, as well as the 25% and 75% quantiles. The cross  
696 and horizontal lines indicate the mean and median values in the corresponding group,  
697 respectively. Significance levels were calculated using a permutation test with 10,000  
698 replicates.  $*P < 0.05$ ; NS, not significant. **(b)** Relative abundance and detected ratio of  
699 five species (*B. fragilis*, *B. salanitronis*, *B. barnesiae*, *C. leptum* and *Firmicutes*  
700 bacterium ZOR0006) in the six sites. Blue bars indicate the detection ratio of each  
701 species at each site.

702 **Figure 6.** Microorganisms influence the expression of immune-related genes in the  
703 uterus. **(a)** Hierarchical clustering and **(b)** pairwise Pearson's correlations of 12 samples

704 using transcriptional profiles. **(c)** Differentially expressed genes between groups with  
705 high and low egg production. Eight well-documented inflammatory markers are labeled.  
706 **(d)** Comparison of expression changes of eight inflammatory markers in the uterus  
707 between groups with high and low egg production by a q-PCR approach. **(e)** Top 20  
708 functional categories enriched for 739 genes that were significantly downregulated in  
709 the high-egg production group. The enrichment analysis was performed using the  
710 Metascape tool (see Method). GO-BP: biological process (blue), GO-MF: molecular  
711 function (yellow) and KEGG (red).

712

### 713 **Availability of supporting data**

714 The sequencing data for this project have been deposited in the National Genomics Data  
715 Center (<https://bigd.big.ac.cn/>) under accession numbers CRA002196 (microbiome),  
716 CRA002195 (Whole genome resequencing) and CRA003376 (RNA-seq).

717

### 718 **Additional Files**

719 **Supplementary Figure S1.** Distribution of egg number at 300 days of age (EN300).  
720 Compared to the 20% of hens with the highest EN300 values, the 20% of hens with the  
721 lowest EN300 values exhibited a later start laying age, an earlier stop aging day and  
722 irregular lay performance.

723 **Supplementary Figure S2.** Quality assessment of sequencing data, alpha diversity,  
724 relative abundance, and Spearman's  $r$  values of specific microbiota among the six sites.  
725 **(a)** Length distribution of reads, quality score of each base, quality score distribution of  
726 sequencing data and error rate distribution of reads. **(b-f)** Alpha diversity comparison

727 based on Good's coverage, observed OTU , ACE, Chao1, and Simpson indices, using  
728 Wilcoxon rank-sum test to determine significant differences. **(g)** Rarefaction curves of  
729 observed OTU. **(h)** Alpha diversity values of the six sites. Values are represented as  
730 median±SD. **(i)** *P* values of Wilcoxon rank-sum test of each comparison for six alpha  
731 diversity indices. **(j)** PCoA of the 768 samples based on unweighted UniFrac distances.  
732 **(k)** Relative abundance of the top ten dominant microbial phyla in the six sites. **(l)** Only  
733 microbial genera that were present in at least 461 samples (60% of the total) were  
734 plotted. Each row represents a microorganism. Among 2,475 Spearman's *r* values, only  
735 362 (14.62%) were significantly correlated ( $P < 0.05$ ).

736 **Supplementary Figure S3.** Comparison of the functional capacities of the reproductive  
737 and digestive microbial communities among the six sites. **(a)** Overlap of the top 50  
738 predictions among the six sites. **(b)** Heatmap showing the 36 overlapped predictions  
739 with different abundances among the six sites. The heatmap is color-coded based on  
740 row *Z* scores. **(c)** Map showing 65 site-associated bacterial taxa identified by LEfSe  
741 (LDA score > 4) in the test trial.

742 **Supplementary Figure S4.** The number distribution of OTUs with different existing  
743 ratio of samples and significantly heritable microorganisms. **(a)** The number plot of  
744 OTUs with different existing ratio of samples. **(b)** The relationship of existing ratio and  
745 the slope of the curve in A. The dotted line indicated the threshold utilized to remove  
746 existing ratio distribution trend due to fluctuate greatly. The number of significantly  
747 heritable microorganism OTUs, genera, and species ( $P < 0.05$ ) grouped by sampling  
748 phyla **(c, e, g)** and site **(d, f, h)**.

749 **Supplementary Figure S5.** Significantly EN300-associated microorganisms. The  
750 number of microorganisms significantly associated with EN300 detected at OTU, genus,  
751 and species ( $P < 0.05$ ) levels grouped by sampling phyla (**a, c, e**) and site (**b, d, f**).

752 **Supplementary Figure S6.** EN300-associated microorganisms. **(a)** The number of  
753 microbial genera (left) and OTUs (right) associated with EN300 at  $P < 0.05$  of three  
754 test methods of six sites and their overlap. **(b-c)** Pearson's and Spearman's  $r$  values  
755 between EN300 and EN300-associated 26 genera and 39 OTUs. Red and blue tiles  
756 indicate positive and negative correlations, respectively. Significant  $r$  values are filled  
757 in numerically ( $P < 0.05$ ).

758 **Supplementary Figure S7.** Pearson correlations between EN300 and EN300-  
759 associated microorganisms. **(a)** Pearson's  $r$  values of candidate microbial species in the  
760 six sites. **(b)** Pearson's  $r$  values among microbial species in each site. CP: Crop, GZ:  
761 Gizzard, SI: small intestine, UT: uterus, IS: Isthmus, VA: vagina. Red and blue tiles  
762 indicate positive and negative correlations, respectively. The ratios on the right side of  
763 each site represents the number of significant correlations.  $*P < 0.05$ .

764 **Supplementary Figure S8.** Differences in the relative abundance of five species  
765 between the 20% of chickens with the highest and lowest egg production (EN300). **(a)**  
766 EN300 values for the 20% of individuals with the highest and lowest egg production.  
767 **(b)** EN300 values for the 20% of individuals with the highest and lowest abundances  
768 of *Clostridium leptum*, *Bacteroides salanitronis*, *Firmicutes* bacterium ZOR0006, *B.*  
769 *barnesiae*, and *B. fragilis* in the three reproductive tract sites. All comparisons were  
770 significantly different, established at  $P < 0.05$ .

771 **Supplementary Figure S9.** Top 20 functional categories enriched by 1,051 genes  
772 exhibited significant expression changes between groups with the high- and low- egg  
773 production. The enrichment analysis was performed using the Metascape tool (See  
774 Method). GO-BP: biological process (blue), GO-MF: molecular function (yellow) and  
775 KEGG (red).

776

777 **Supplementary Table S1.** Summary of 16S rRNA gene sequencing.

778 **Supplementary Table S2.** Summary statistics of 16S rRNA gene sequencing.

779 **Supplementary Table S3.** Summary of host whole genome sequencing.

780 **Supplementary Table S4.** Summary statistics of host whole genome sequencing.

781 **Supplementary Table S5.** Primer sequences for q-PCR.

782 **Supplementary Table S6.** Analysis of Bray-Curtis distance similarities.

783 **Supplementary Table S7.** Statistical test for the 65 functional capacities among the six  
784 sites.

785 **Supplementary Table S8.** Correlation between genetic relatedness matrix (GRM) and  
786 each Bray-Curtis (BC) distance or microbial relationship matrix (MRM) by Mantel test.

787 **Supplementary Table S9.** Heritability ( $h^2$ ) of the microbiota and cumulative  
788 abundance of heritable microbiota.

789 **Supplementary Table S10.** Heritability ( $h^2$ ) of reproductive traits from previous  
790 reports.

791

792 **List of abbreviations**

793 QTLs: quantitative trait loci;  $h^2$ : heritability; GWAS: genome-wide association study;  
794 *PLAG1*: pleiomorphic adenoma gene 1; *LYN*: lck/yes-related novel tyrosine kinase gene;  
795 EN300: egg number at 300 days of age; M: million; OTUs: operational taxonomic units;  
796 BC: Bray-Curtis; PCoA: Principal coordinates analysis; FDR: false discovery rate;  
797 ANOSIM: Analysis of Similarity; LDA: Linear discriminant analysis; LEfSe: Linear  
798 discriminant analysis Effect Size; BWA: Burrows-Wheeler Alignment tool; GATK:  
799 Genome Analysis Toolkit; SNP: single nucleotide polymorphism; MRM: microbial  
800 relationship matrix; PCs: principal components; GRM: genetic relatedness matrix;  $m^2$ :  
801 microbiability; LMM: linear mixed model; RNA-seq: RNA sequencing; TPM:  
802 transcripts per million; GO: Gene Ontology; KEGG: Kyoto Encyclopedia of Genes and  
803 Genomes; q-PCR: quantitative PCR; CPSA: capsular polysaccharide A.

804

#### 805 **Ethics approval**

806 All animal experiments were approved and reviewed by Animal Care and Use  
807 Committee Institutional of Sichuan Agricultural University (Approval No. DKY-  
808 2018102015).

809

#### 810 **Competing interests**

811 The authors declare no competing interests.

812

#### 813 **Acknowledgements**

814 We thank the High-Performance Computing Platform of Sichuan Agricultural  
815 University and Ya'an Big Data Industrial Park for providing computing resources and  
816 support that have contributed to these research results. This work was supported by the  
817 Sichuan Science and Technology Program (2019JDTD0009, 2020YFH0138 and  
818 2021YFYZ0009), the Fok Ying-Tong Education Foundation for Young Teachers in the  
819 Higher Education Institutions of China (161026).

820

### 821 **Author contributions**

822 D.L., M.L. and Q.Z. designed the study; T.W., S.K.M., Y.S., W.Z., and S.T. wrote the  
823 manuscript; Z.X., M.H., X.Z., H.Y., X.F., and Q.N. collected the sample and extracted  
824 the DNA. M.Y., D.Y., Y.L., B.Z, and M.Z., did bioinformatics analyses; D.L. wrote  
825 methods; D.L., M.L. and Q.Z. supervised the work.

826

### 827 **References**

- 828 1. Wolc A, Arango J, Settar P, et al. Analysis of egg production in layer chickens using a random  
829 regression model with genomic relationships. *Poult Sci* 2013;**92**(6):1486-1491.
- 830 2. Hu ZL, Park CA, Reecy JM. Building a livestock genetic and genomic information  
831 knowledgebase through integrative developments of Animal QTLdb and CorrDB. *Nucleic  
832 Acids Res* 2019;**47**(D1):D701-D710.
- 833 3. Yuan J, Sun C, Dou T, et al. Identification of Promising Mutants Associated with Egg Production  
834 Traits Revealed by Genome-Wide Association Study. *PLoS One* 2015;**10**(10):e0140615.
- 835 4. Zhang GX, Fan QC, Wang JY, et al. Genome-wide association study on reproductive traits in

- 836       Jinghai Yellow Chicken. *Anim Reprod Sci* 2015;**163**:30-34.
- 837   5.   Tongsiri S, Jeyaruban MG, Van Der Werf JH. Genetic parameters for egg production traits in  
838       purebred and hybrid chicken in a tropical environment. *Br Poult Sci* 2015;**56**(6):613-620.
- 839   6.   Savegnago RP, Caetano SL, Ramos SB, et al. Estimates of genetic parameters, and cluster and  
840       principal components analyses of breeding values related to egg production traits in a White  
841       Leghorn population. *Poult Sci* 2011;**90**(10):2174-2188.
- 842   7.   Chen C, Song X, Wei W, et al. The microbiota continuum along the female reproductive tract  
843       and its relation to uterine-related diseases. *Nat Commun* 2017;**8**(1):875.
- 844   8.   Wen C, Li Q, Lan F, et al. Microbiota continuum along the chicken oviduct and its association  
845       with host genetics and egg formation. *Poult Sci* 2021:101104.
- 846   9.   Fettweis JM, Serrano MG, Brooks JP, et al. The vaginal microbiome and preterm birth. *Nat Med*  
847       2019;**25**(6):1012-1021.
- 848   10. Serrano MG, Parikh HI, Brooks JP, et al. Racioethnic diversity in the dynamics of the vaginal  
849       microbiome during pregnancy. *Nat Med* 2019;**25**(6):1001-1011.
- 850   11. Den Hartog G, De Vries-Reilingh G, Wehrmaker AM, et al. Intestinal immune maturation is  
851       accompanied by temporal changes in the composition of the microbiota. *Benef Microbes*  
852       2016;**7**(5):677-685.
- 853   12. Choi JH, Kim GB, Cha CJ. Spatial heterogeneity and stability of bacterial community in the  
854       gastrointestinal tracts of broiler chickens. *Poult Sci* 2014;**93**(8):1942-1950.
- 855   13. Lee S, La T-M, Lee H-J, et al. Characterization of microbial communities in the chicken oviduct  
856       and the origin of chicken embryo gut microbiota. *Sci Rep* 2019;**9**(1):6838.
- 857   14. Elokil AA, Magdy M, Melak S, et al. Faecal microbiome sequences in relation to the egg-laying



- 858 performance of hens using amplicon-based metagenomic association analysis. *Animal*  
859 2020;**14**(4):706-715.
- 860 15. Carmody RN, Gerber GK, Luevano JM, Jr., et al. Diet dominates host genotype in shaping the  
861 murine gut microbiota. *Cell Host Microbe* 2015;**17**(1):72-84.
- 862 16. Rothschild D, Weissbrod O, Barkan E, et al. Environment dominates over host genetics in  
863 shaping human gut microbiota. *Nature* 2018;**555**(7695):210-215.
- 864 17. Liu H, Chen Z, Gao G, et al. Characterization and comparison of gut microbiomes in nine  
865 species of parrots in captivity. *Symbiosis* 2019;**78**(3):241-250.
- 866 18. Ji J, Luo CL, Zou X, et al. Association of host genetics with intestinal microbial relevant to body  
867 weight in a chicken F2 resource population. *Poult Sci* 2019;**98**(9):4084-4093.
- 868 19. Mignon-Grasteau S, Narcy A, Rideau N, et al. Impact of Selection for Digestive Efficiency on  
869 Microbiota Composition in the Chicken. *PLoS One* 2015;**10**(8):e0135488.
- 870 20. Scepanovic P, Hodel F, Mondot S, et al. A comprehensive assessment of demographic,  
871 environmental, and host genetic associations with gut microbiome diversity in healthy  
872 individuals. *Microbiome* 2019;**7**(1):130.
- 873 21. Caporaso JG, Lauber CL, Walters WA, et al. Global patterns of 16S rRNA diversity at a depth  
874 of millions of sequences per sample. *Proc Natl Acad Sci U S A.* 2011;**108**:4516-4522.
- 875 22. Martin M. Cutadapt removes adapter sequences from high-throughput sequencing reads.  
876 *EMBnet J* 2011;**17**(1):10-12.
- 877 23. Edgar RC, Haas BJ, Clemente JC, et al. UCHIME improves sensitivity and speed of chimera  
878 detection. *Bioinformatics* 2011;**27**(16):2194-2200.
- 879 24. Edgar RC. UPARSE: highly accurate OTU sequences from microbial amplicon reads. *Nat.*

880       Methods 2013;**10**(10):996-998.

881   25. Quast C, Pruesse E, Yilmaz P, et al. The SILVA ribosomal RNA gene database project: improved  
882       data processing and web-based tools. *Nucleic Acids Res* 2013;**41**:D590-D596.

883   26. Kozich J, Westcott S, Baxter N, et al. Development of a dual-index sequencing strategy and  
884       curation pipeline for analyzing amplicon sequence data on the MiSeq Illumina sequencing  
885       platform. *Appl Environ Microbiol* 2013;**79**(17):5112-5120.

886   27. Edgar RC. MUSCLE: multiple sequence alignment with high accuracy and high throughput.  
887       *Nucleic Acids Res* 2004;**32**(5):1792-1797.

888   28. Bolyen E, Rideout J, Dillon M, et al. Reproducible, interactive, scalable and extensible  
889       microbiome data science using QIIME 2. *Nat Biotechnol* 2019;**37**(8):852-857.

890   29. Langfelder P, Horvath S. WGCNA: an R package for weighted correlation network analysis.  
891       *BMC Bioinformatics* 2008;**9**:559.

892   30. Douglas GM, Maffei VJ, Zaneveld J, et al. PICRUSt2: An improved and extensible approach  
893       for metagenome inference. *BioRxiv* 2019:672295.

894   31. Segata N, Izard J, Waldron L, et al. Metagenomic biomarker discovery and explanation. *Genome*  
895       *Biol* 2011;**12**(6):R60.

896   32. Li M, Tian S, Jin L, et al. Genomic analyses identify distinct patterns of selection in  
897       domesticated pigs and Tibetan wild boars. *Nat Genet* 2013;**45**(12):1431-1438.

898   33. Li H, Durbin R. Fast and accurate long-read alignment with Burrows–Wheeler transform.  
899       *Bioinformatics* 2010;**26**(5):589-595.

900   34. McKenna A, Hanna M, Banks E, et al. The Genome Analysis Toolkit: a MapReduce framework  
901       for analyzing next-generation DNA sequencing data. *Genome Res* 2010;**20**(9):1297-1303.

- 902 35. Li H, Ruan J, Durbin R. Mapping short DNA sequencing reads and calling variants using  
903 mapping quality scores. *Genome Res* 2008;**18**(11):1851-1858.
- 904 36. Wang K, Li M, Hakonarson H. ANNOVAR: functional annotation of genetic variants from high-  
905 throughput sequencing data. *Nucleic Acids Res* 2010;**38**(16):e164.
- 906 37. Camarinha-Silva A, Maushammer M, Wellmann R, et al. Host Genome Influence on Gut  
907 Microbial Composition and Microbial Prediction of Complex Traits in Pigs. *Genetics*  
908 2017;**206**(3):1637-1644.
- 909 38. Purcell S, Neale B, Todd-Brown K, et al. PLINK: a tool set for whole-genome association and  
910 population-based linkage analyses. *Am J Hum Genet* 2007;**81**(3):559-575.
- 911 39. Yang J, Bakshi A, Zhu Z, et al. Genetic variance estimation with imputed variants finds  
912 negligible missing heritability for human height and body mass index. *Nat Genet*  
913 2015;**47**(10):1114-1120.
- 914 40. Yang J, Lee SH, Goddard ME, et al. GCTA: a tool for genome-wide complex trait analysis. *Am*  
915 *J Hum Genet* 2011;**88**(1):76-82.
- 916 41. Zierer J, Jackson MA, Kastenmuller G, et al. The fecal metabolome as a functional readout of  
917 the gut microbiome. *Nat Genet* 2018;**50**(6):790-795.
- 918 42. Zhou X, Stephens M. Genome-wide efficient mixed-model analysis for association studies. *Nat*  
919 *Genet* 2012;**44**(7):821-824.
- 920 43. Bray NL, Pimentel H, Melsted P, et al. Near-optimal probabilistic RNA-seq quantification. *Nat*  
921 *Biotechnol* 2016;**34**(5):525-527.
- 922 44. Robinson MD, McCarthy DJ, Smyth GK. edgeR: a Bioconductor package for differential  
923 expression analysis of digital gene expression data. *Bioinformatics* 2010;**26**(1):139-140.

- 924 45. Zhou Y, Zhou B, Pache L, et al. Metascape provides a biologist-oriented resource for the analysis  
925 of systems-level datasets. *Nat Commun* 2019;**10**(1):1523.
- 926 46. Verstraelen H, Vilchez-Vargas R, Desimpel F, et al. Characterisation of the human uterine  
927 microbiome in non-pregnant women through deep sequencing of the V1-2 region of the 16S  
928 rRNA gene. *PeerJ* 2016;**4**:e1602.
- 929 47. Mishra AK, Kumar A, Swain DK, et al. Insights into pH regulatory mechanisms in mediating  
930 spermatozoa functions. *Vet World* 2018;**11**(6):852-858.
- 931 48. Fiser PS, Macpherson JW. pH values in the oviduct of the hen during egg formation. *Poult Sci*  
932 1974;**53**(2):827-829.
- 933 49. Yu MD, Lai EM. Warfare between Host Immunity and Bacterial Weapons. *Cell Host Microbe*  
934 2017;**21**(1):3-4.
- 935 50. Moore RW, Park SY, Kubena LF, et al. Comparison of zinc acetate and propionate addition on  
936 gastrointestinal tract fermentation and susceptibility of laying hens to *Salmonella enteritidis*  
937 during forced molt. *Poult Sci* 2004;**83**(8):1276-1286.
- 938 51. Kalisperati P, Spanou E, Pateras IS, et al. Inflammation, DNA Damage, *Helicobacter pylori* and  
939 Gastric Tumorigenesis. *Front Genet* 2017;**8**:20.
- 940 52. Liu J, Yue S, Yang Z, et al. Oral hydroxysafflor yellow A reduces obesity in mice by modulating  
941 the gut microbiota and serum metabolism. *Pharmacol Res* 2018;**134**:40-50.
- 942 53. Moreira G, Sobrinho APR, Bambilra BHS, et al. Synergistic Growth Effect among Bacteria  
943 Recovered from Root Canal Infections. *Braz J Microbiol* 2011;**42**(3):973-979.
- 944 54. Jeong DY, Cho SK, Shin HS, et al. Application of an electric field for pretreatment of a seeding  
945 source for dark fermentative hydrogen production. *Bioresour Technol* 2013;**139**:393-396.

- 946 55. Marche MG, Satta A, Floris I, et al. Quantitative variation in the core bacterial community  
947 associated with honey bees from Varroa- infested colonies. *J Apicult Res* 2019;**58**(3):444-454.
- 948 56. Chousalkar KK, Roberts JR. Ultrastructural changes in the oviduct of the laying hen during the  
949 laying cycle. *Cell Tissue Res* 2008;**332**(2):349-358.
- 950 57. Hrabia A, Lesniak-Walentyn A, Sechman A, et al. Chicken oviduct-the target tissue for growth  
951 hormone action: effect on cell proliferation and apoptosis and on the gene expression of some  
952 oviduct-specific proteins. *Cell Tissue Res* 2014;**357**(1):363-372.
- 953 58. Salanitro JP, Blake IG, Muirhead PA. Studies on the cecal microflora of commercial broiler  
954 chickens. *Appl Microbiol* 1974;**28**(3):439-447.
- 955 59. Reeves AR, Wang GR, Salyers AA. Characterization of four outer membrane proteins that play  
956 a role in utilization of starch by *Bacteroides thetaiotaomicron*. *J Bacteriol* 1997;**179**(3):643-  
957 649.
- 958 60. Nihira T, Suzuki E, Kitaoka M, et al. Discovery of beta-1,4-D-mannosyl-N-acetyl-D-  
959 glucosamine phosphorylase involved in the metabolism of N-glycans. *J Biol Chem*  
960 2013;**288**(38):27366-27374.
- 961 61. Mazmanian SK, Liu CH, Tzianabos AO, et al. An immunomodulatory molecule of symbiotic  
962 bacteria directs maturation of the host immune system. *Cell* 2005;**122**(1):107-118.
- 963 62. Partty A, Kalliomaki M, Salminen S, et al. Infantile Colic Is Associated With Low-grade  
964 Systemic Inflammation. *J Pediatr Gastr Nutr* 2017;**64**(5):691-695.
- 965 63. Shan H, Fischer DP, Dirk W, et al. Expression and Function of Toll-Like Receptor 4 in the  
966 Endometrial Cells of the Uterus. *Endocrinology* 2006;**147**(1):562-570.
- 967 64. Herath S, Lilly ST, Santos NR, et al. Expression of genes associated with immunity in the

968 endometrium of cattle with disparate postpartum uterine disease and fertility. *Reprod Biol*  
969 *Endocrinol* 2009;**7**:55.

970 65. Kannaki TR, Shanmugam M, Verma PC. Toll-like receptors and their role in animal  
971 reproduction. *Anim Reprod Sci* 2011;**125**(1-4):1-12.

A

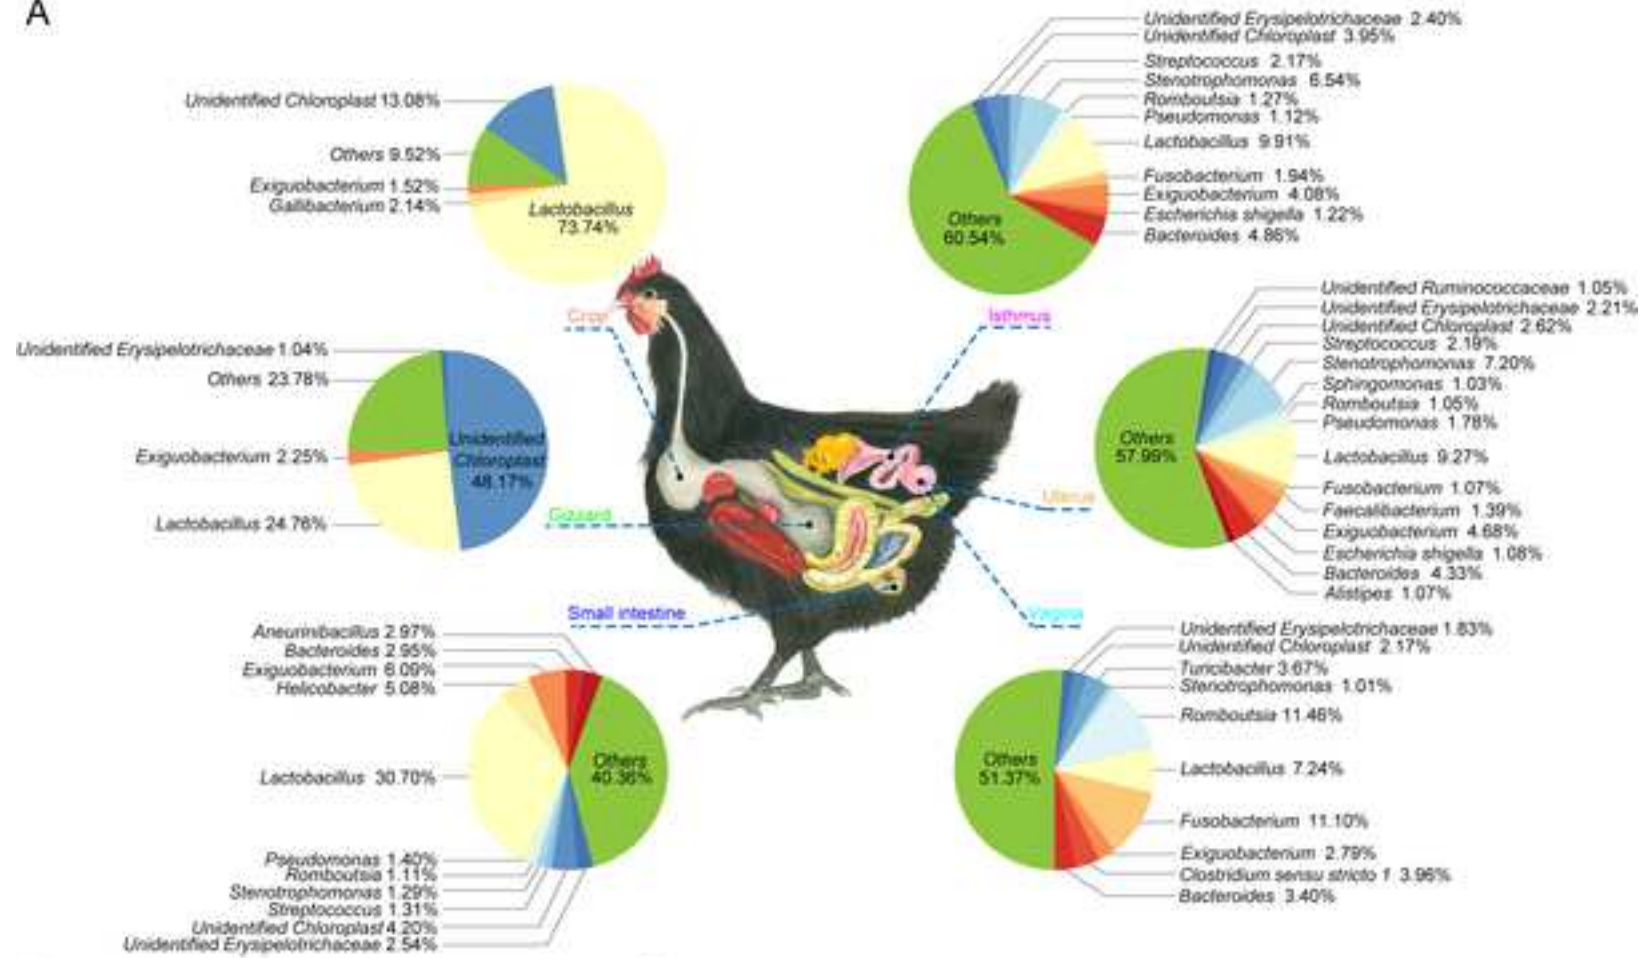

B

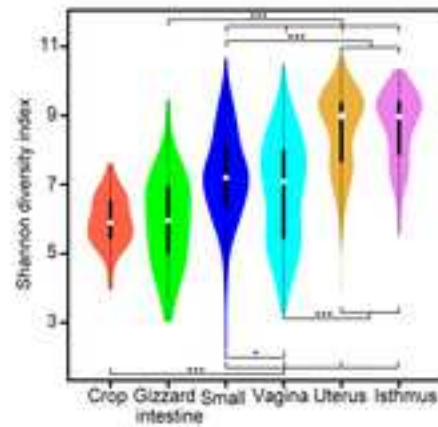

C

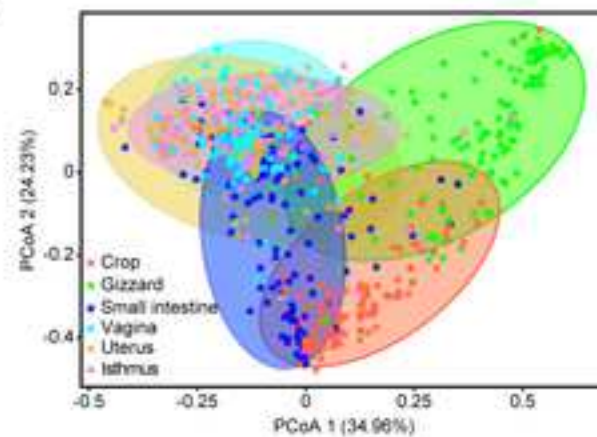

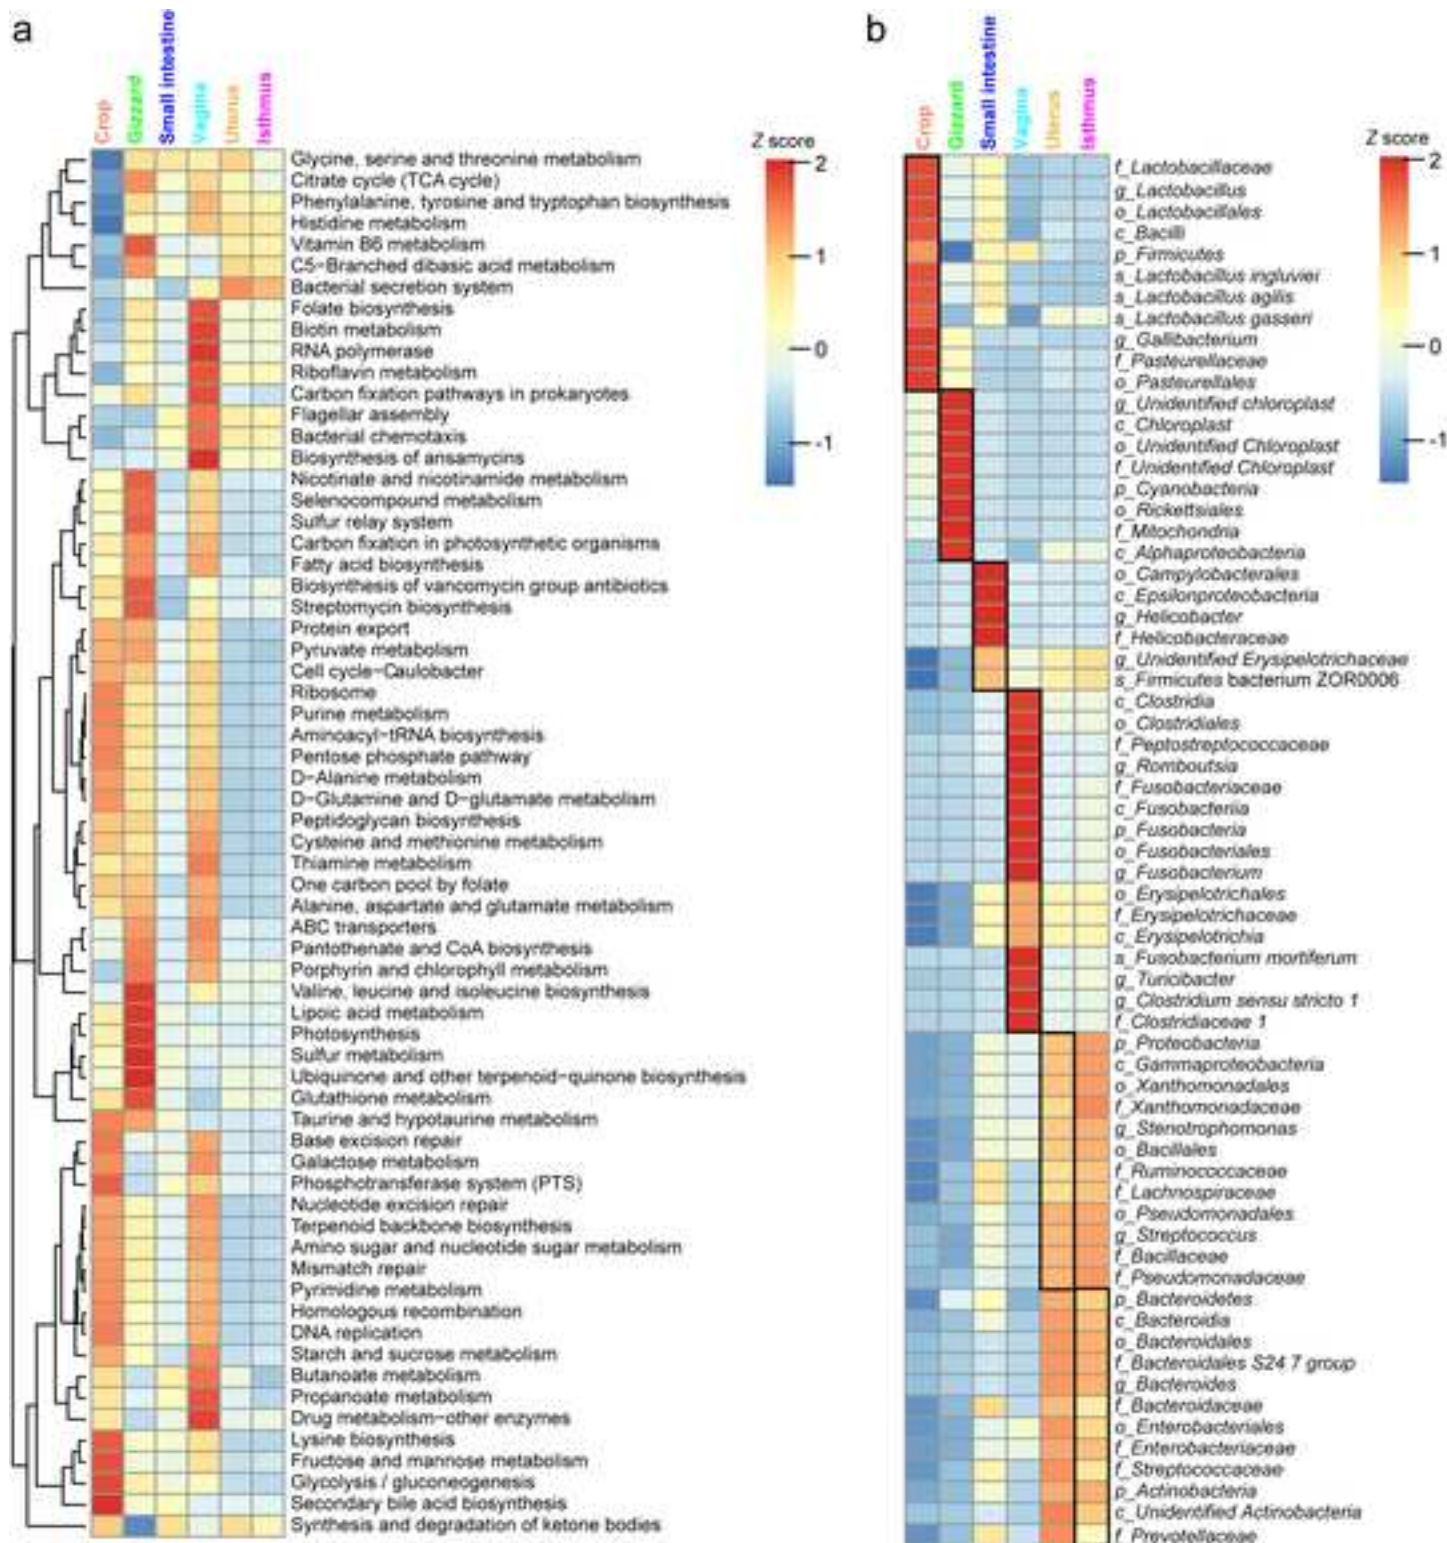



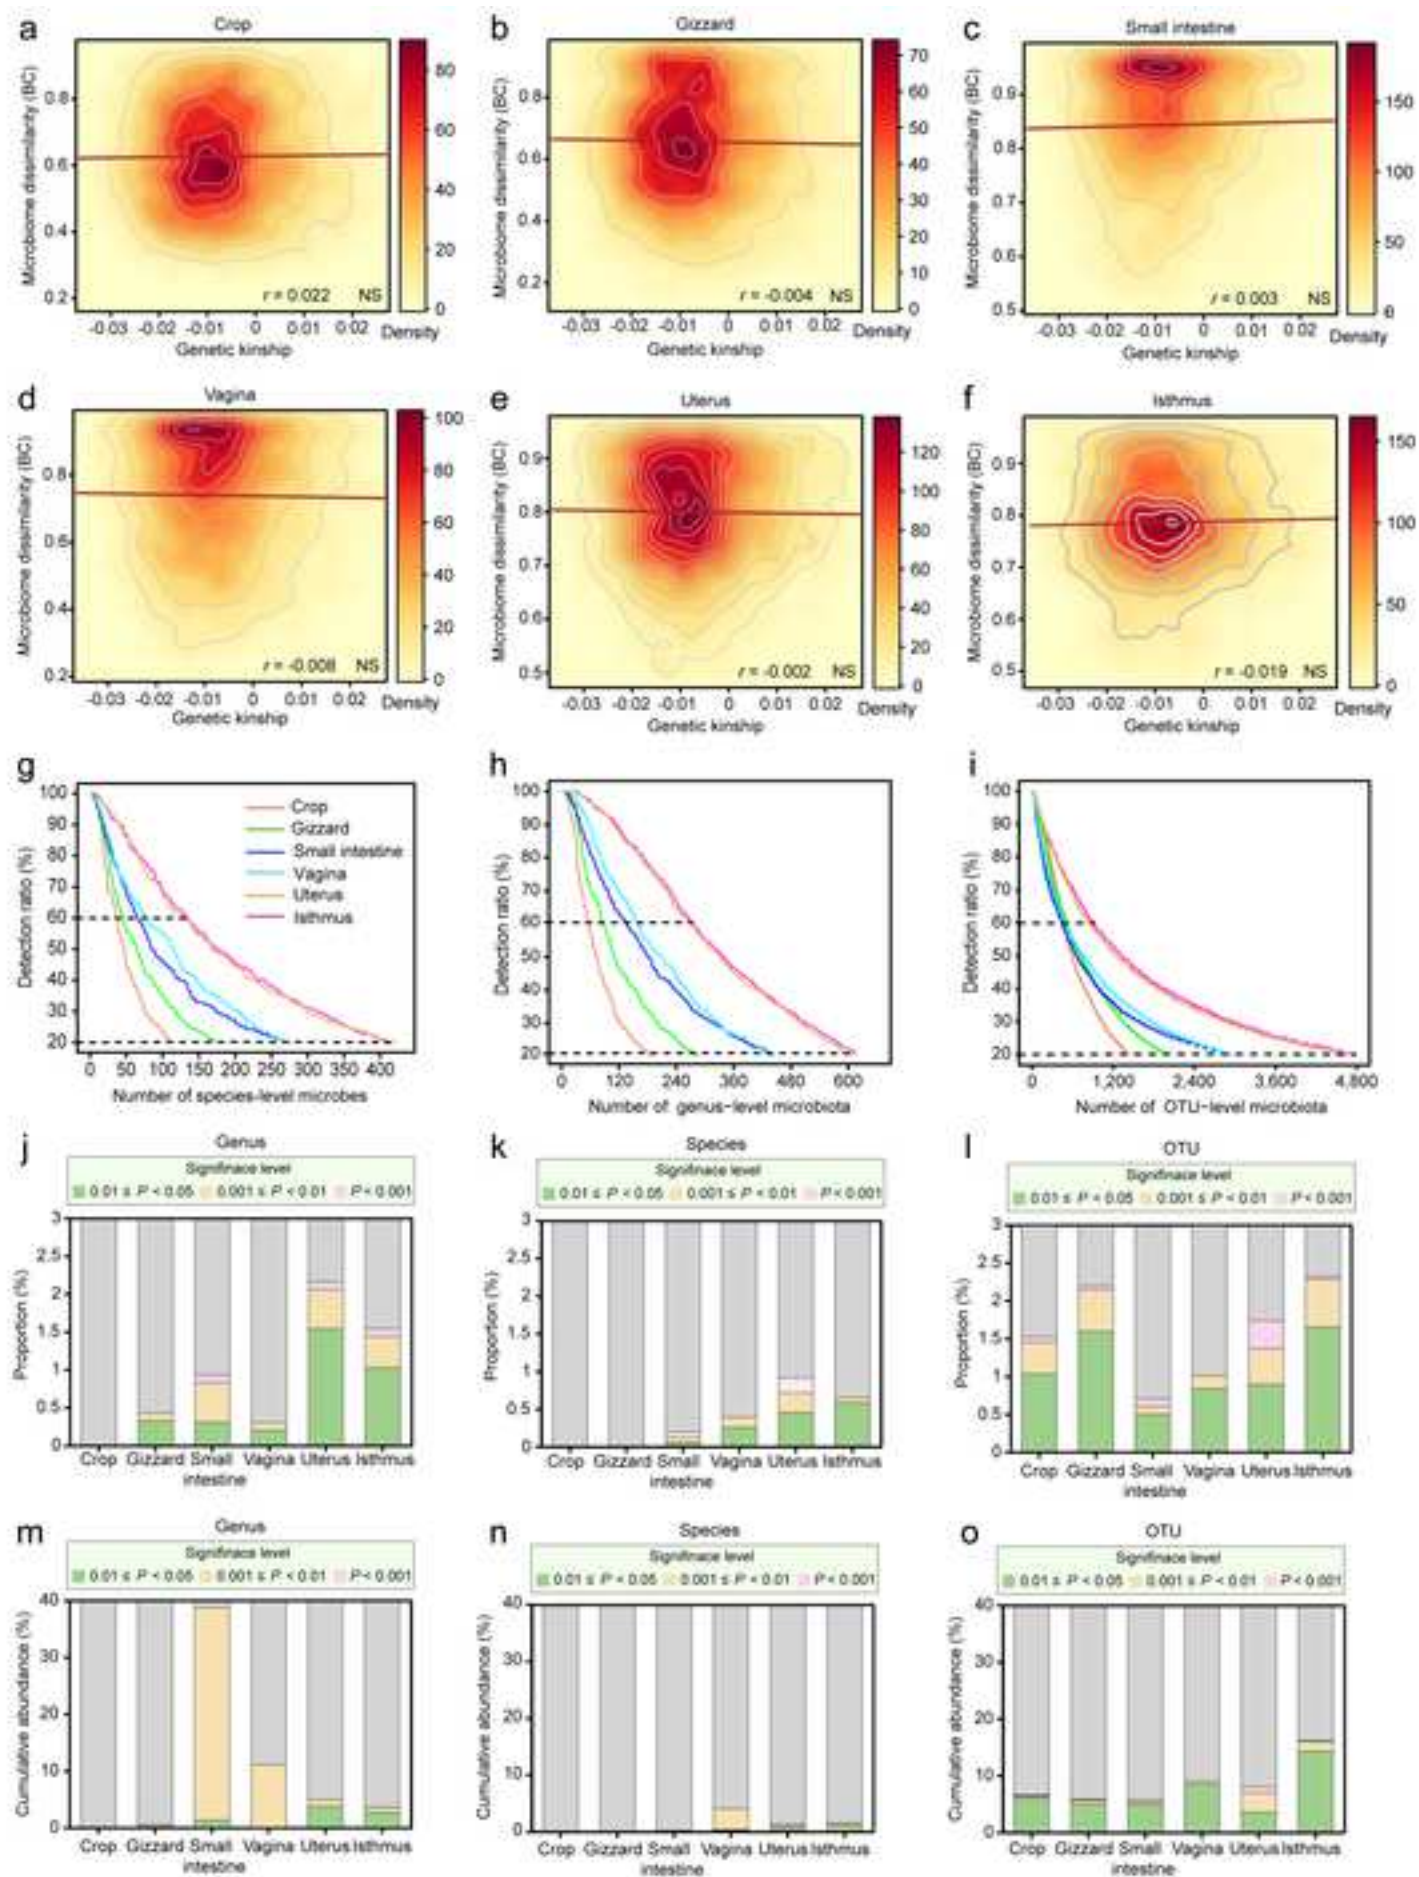

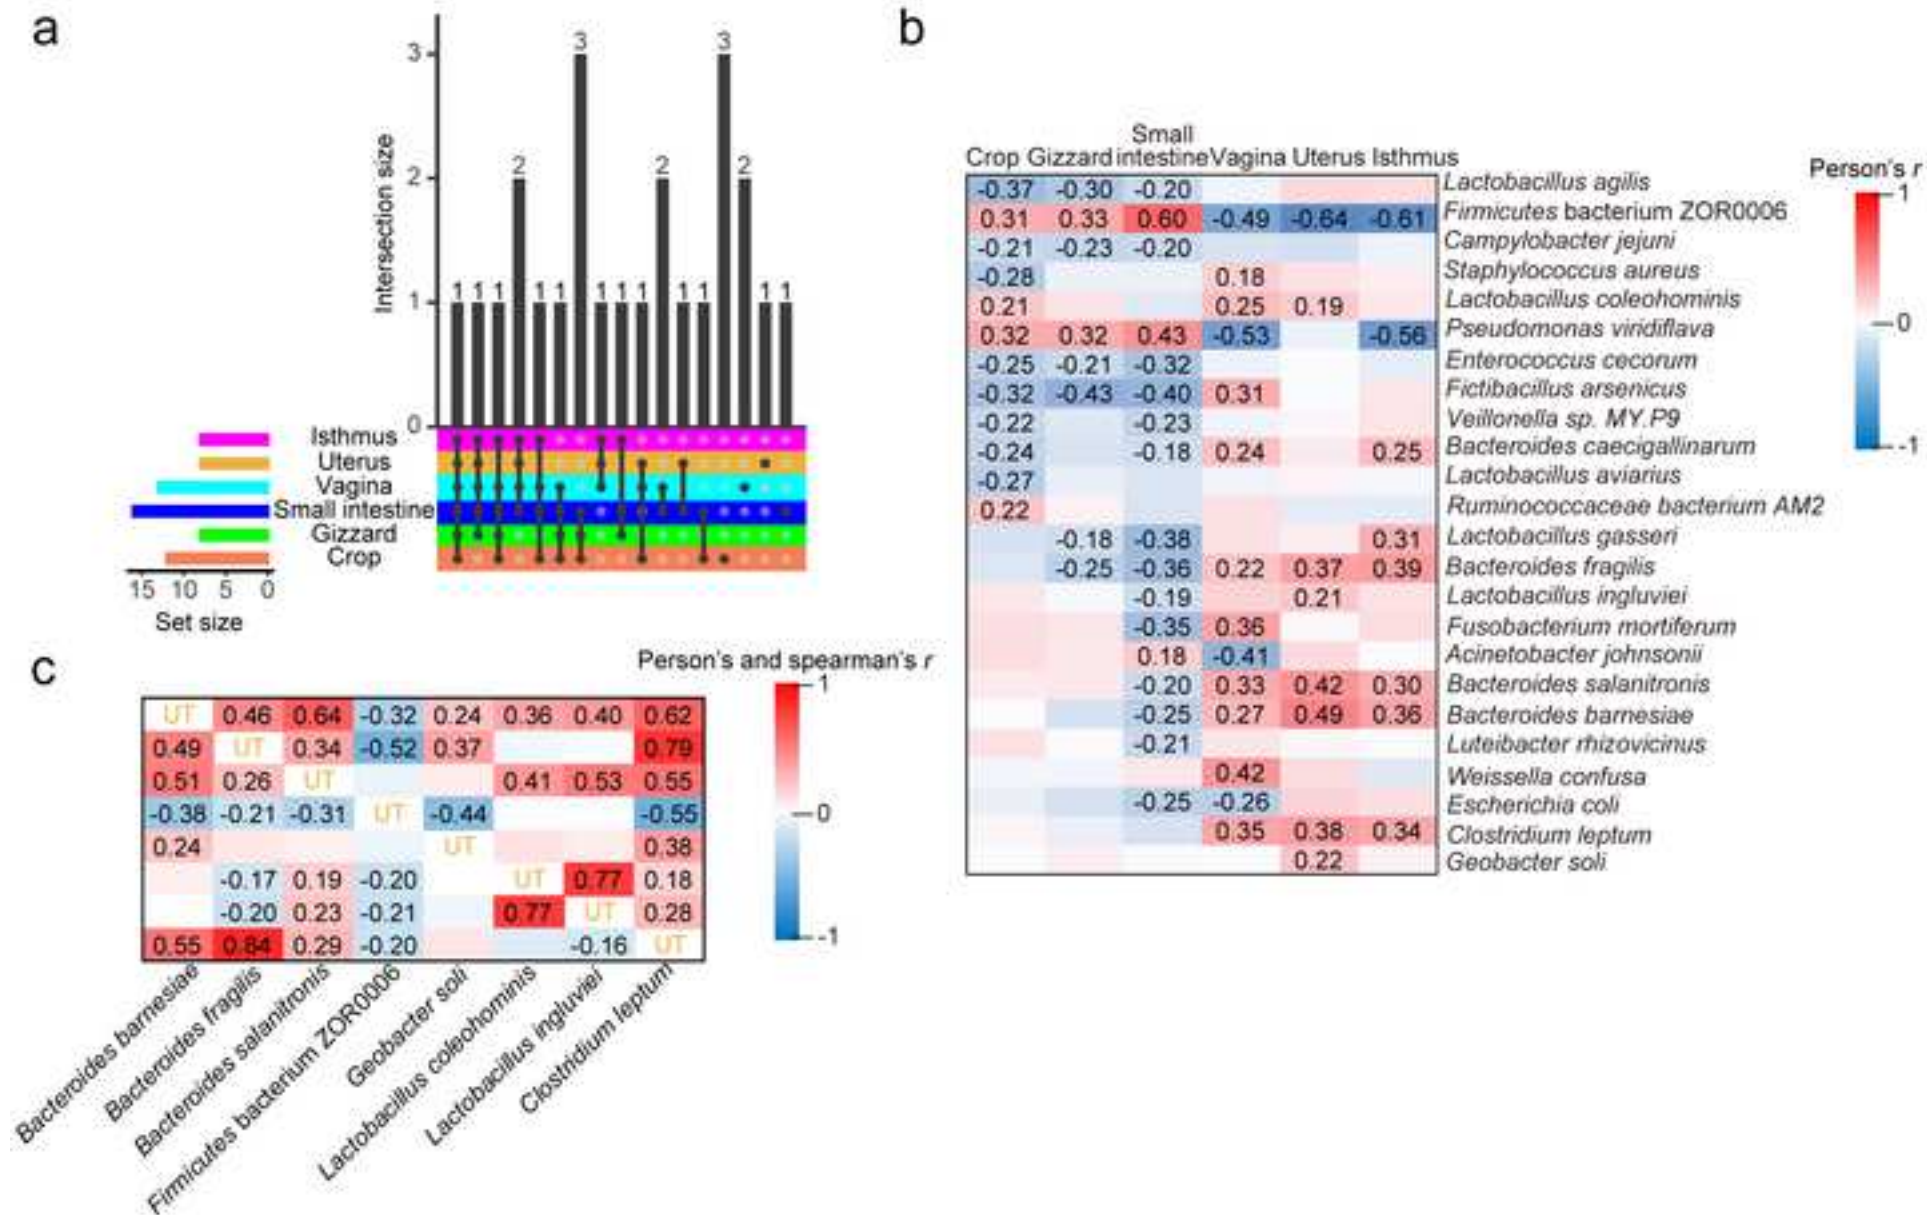

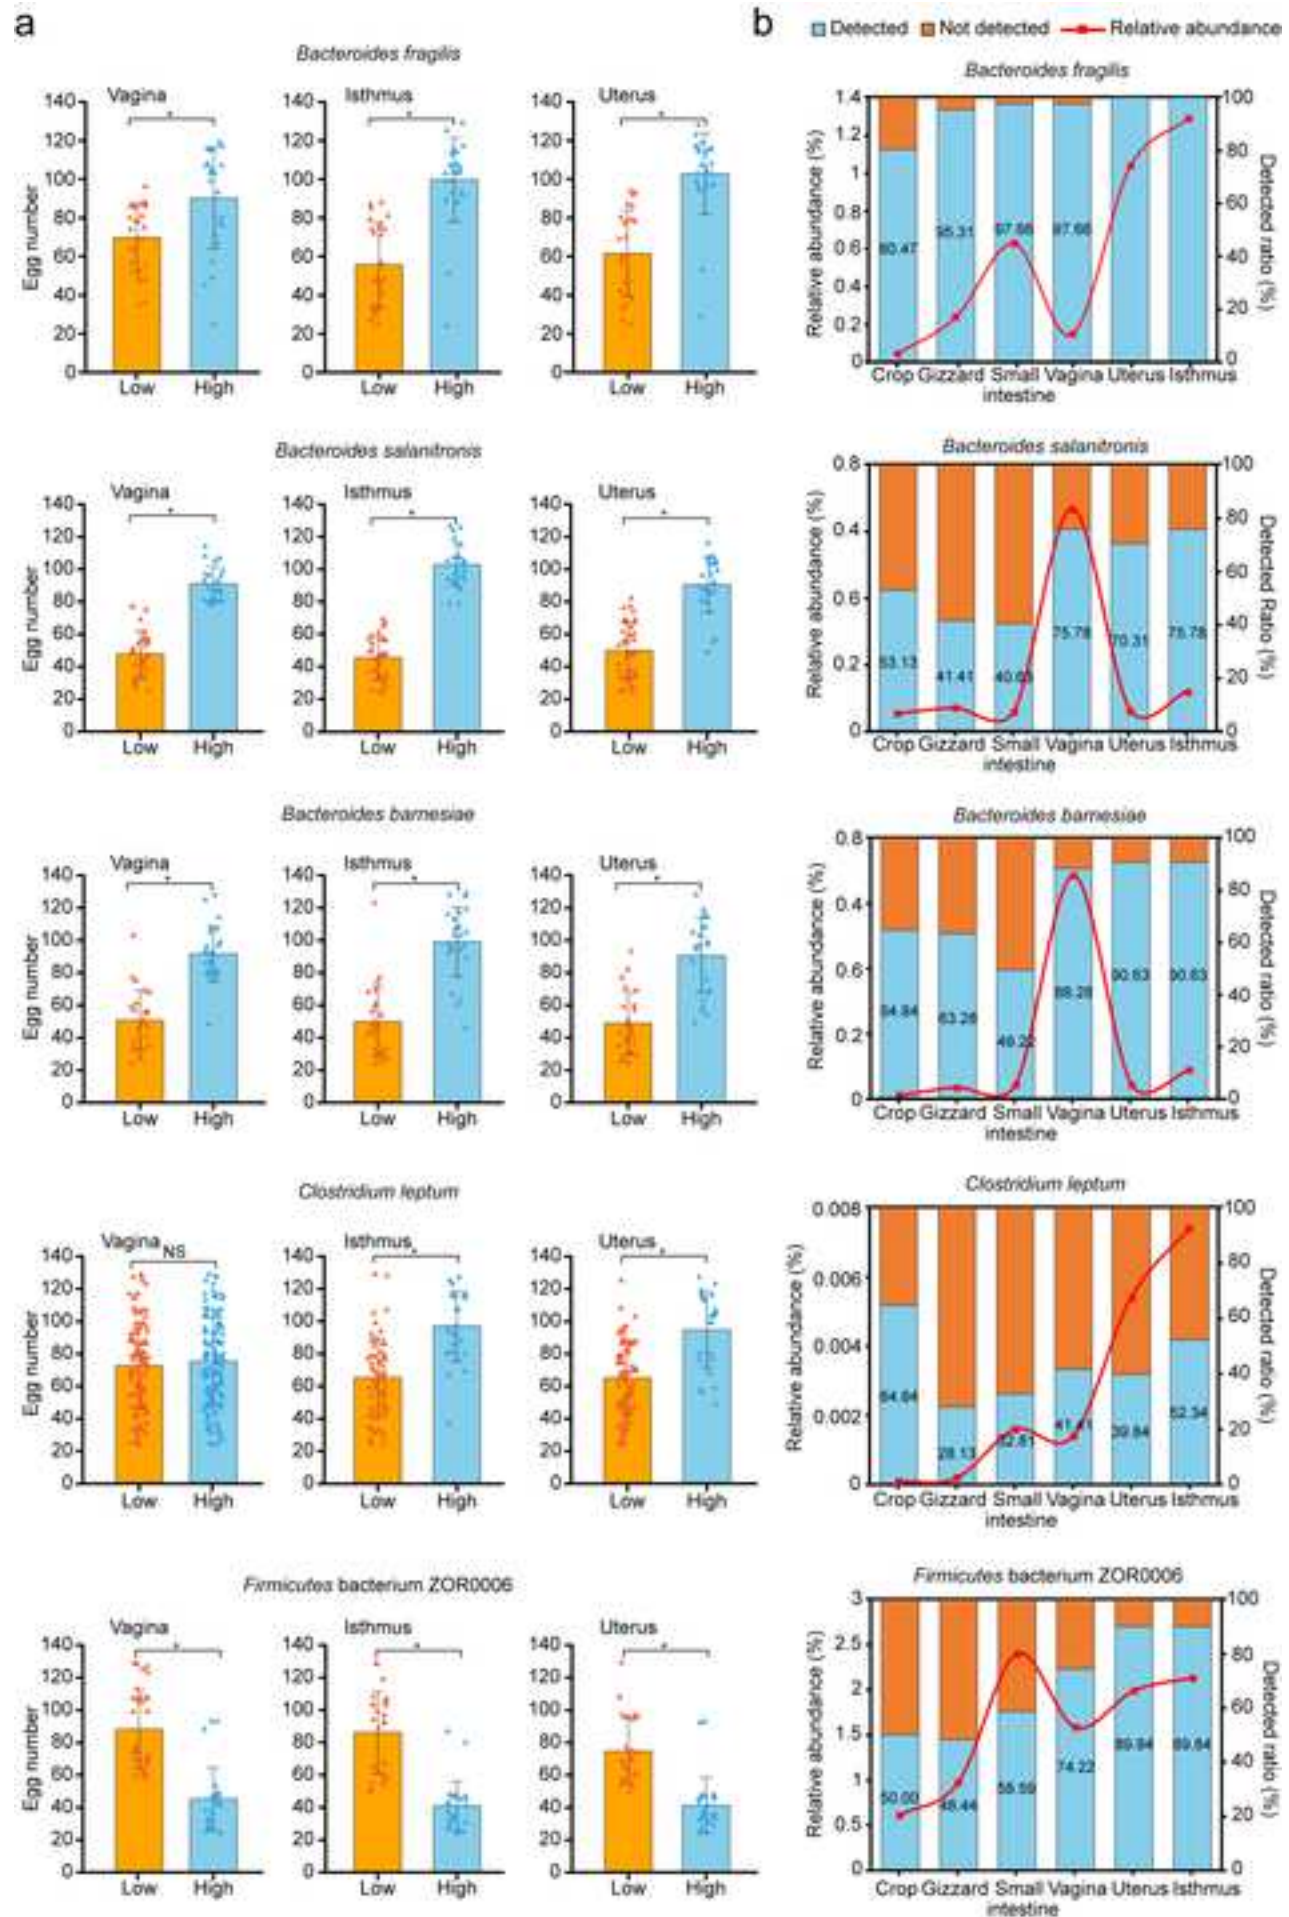

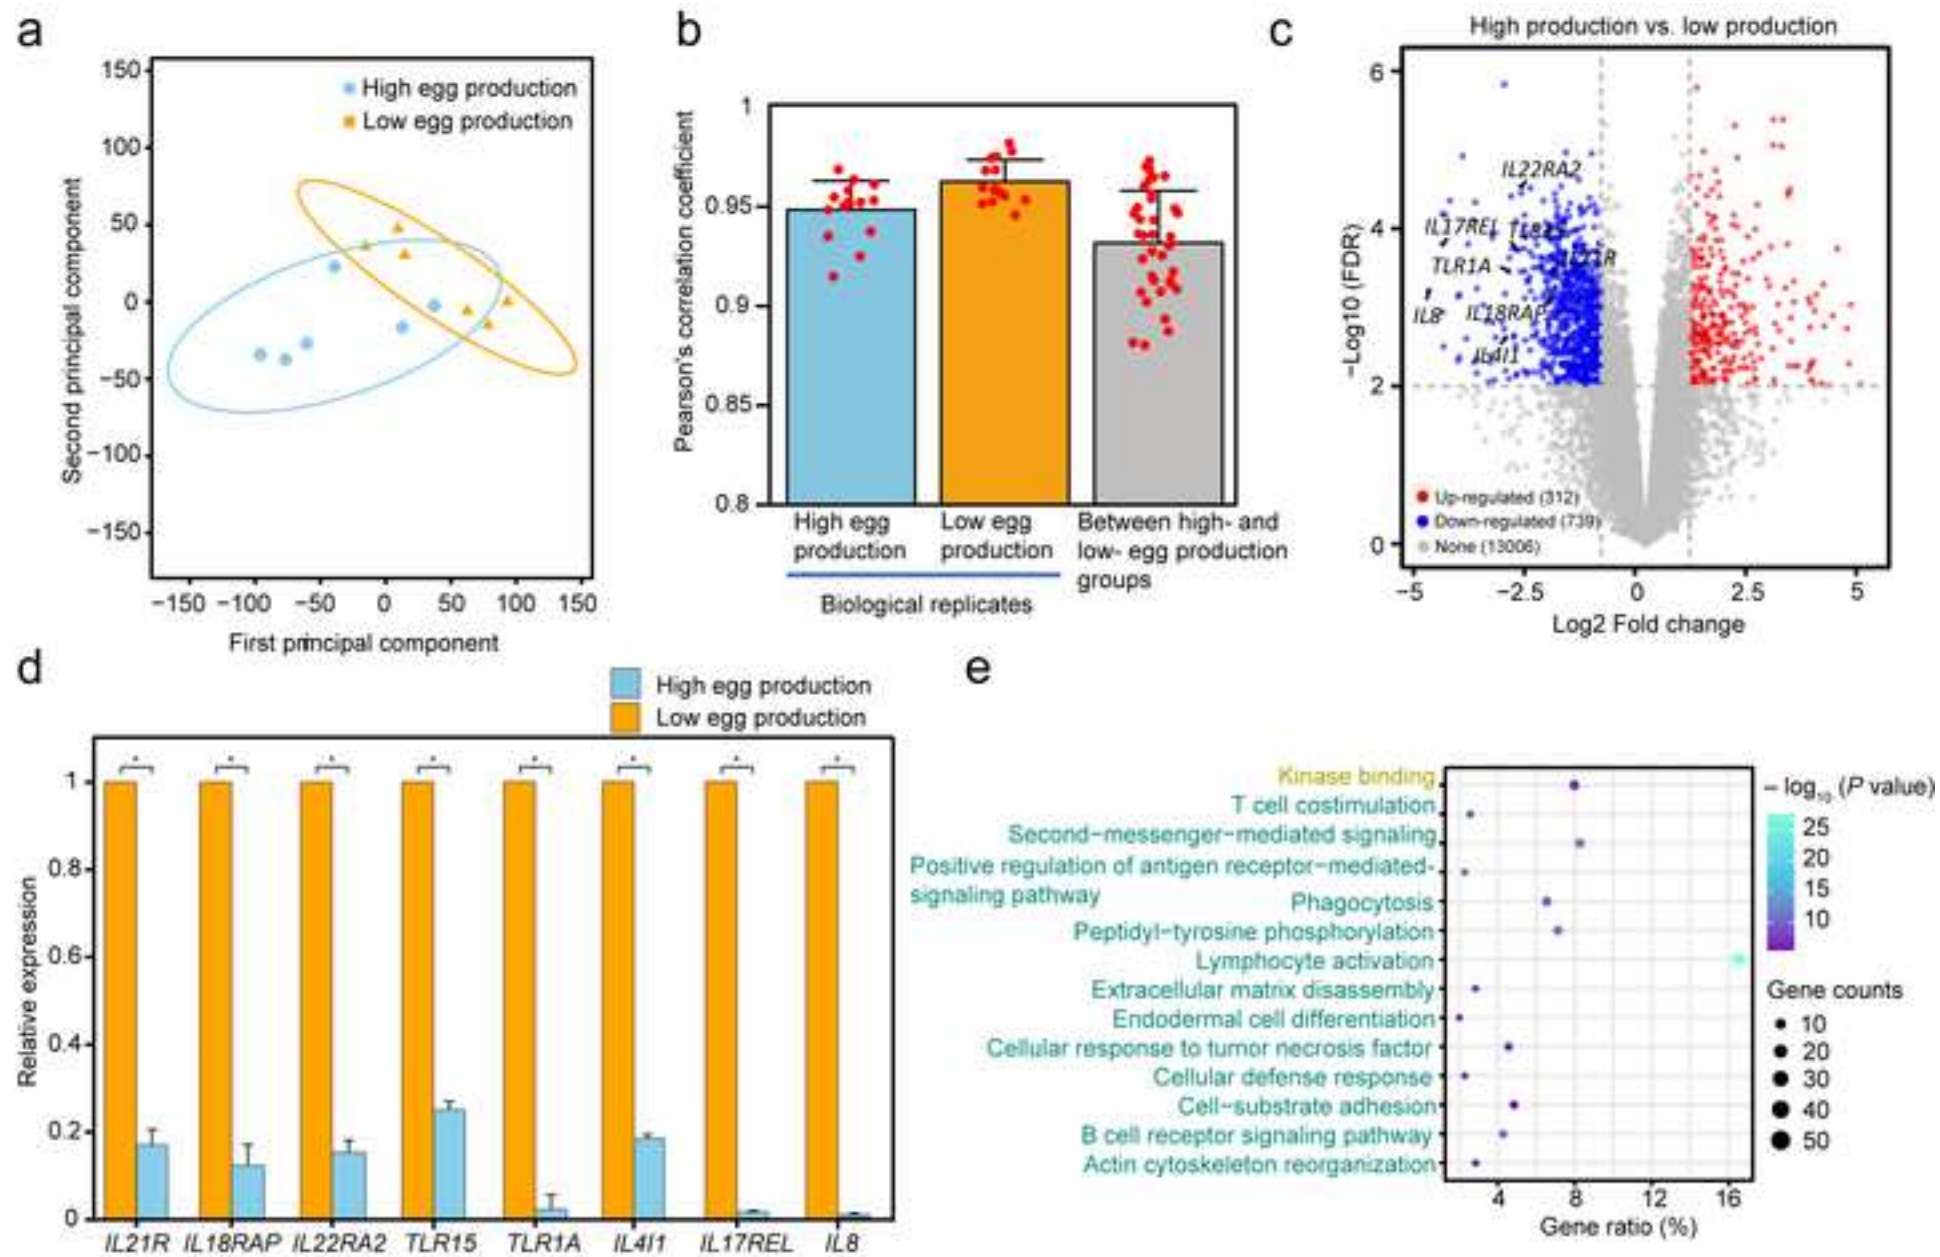

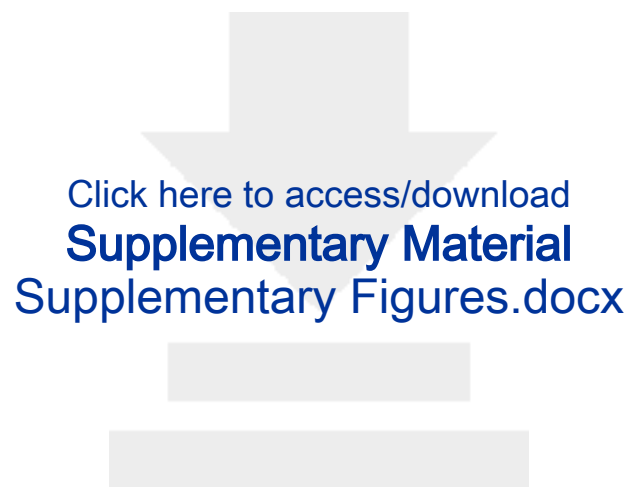



Click here to access/download  
**Supplementary Material**  
Supplementary Tables.xlsx



Supplement: giab067_giga-d-21-00132_original_submission.pdf [file giab067_giga-d-21-00132_original_submission.pdf]
